# Supplementary material for: International incidence and mortality trends of liver cancer: a global profile
Source: PubMed Central journal article supplement (PMC5374459; doi:10.1038/srep45846), 2017-03-31

## **International incidence and mortality trends of liver cancer: a global profile**

Martin CS Wong MD, MPH<sup>1,2,\*</sup>, Johnny JY Jiang MD, PhD<sup>3</sup>, William B Goggins PhD (Harvard)<sup>1</sup>, Miaoyin Liang MPH<sup>1</sup>, Yuan Fang PhD<sup>1</sup>, Franklin D Fung BSc (Hons)<sup>1</sup>, Colette Leung BSc (Hons)<sup>1</sup>, Harry HX Wang PhD<sup>4,5</sup>, Grace LH Wong MD, FRCP<sup>2,6,7</sup>, Vincent WS Wong MD, FRCP<sup>2,6,7</sup>, Henry LY Chan MD, FRCP<sup>2,6,7</sup>

1. School of Public Health and Primary Care, Faculty of Medicine, Chinese University of Hong Kong. Prince of Wales Hospital, Shatin, New Territories, Hong Kong
2. Institute of Digestive Disease, Faculty of Medicine, Chinese University of Hong Kong
3. Peking Union School of Public Health, Chinese Academy of Medical Sciences and Peking Union Medical College, China
4. School of Public Health, Sun Yat-Sen University, Guangzhou, 510080, P.R. China;
5. General Practice and Primary Care, Institute of Health and Wellbeing, University of Glasgow, Glasgow G12 9LX, UK;
6. Department of Medicine and Therapeutics, Faculty of Medicine, Chinese University of Hong Kong
7. State Key Laboratory of Digestive Disease, Faculty of Medicine, Chinese University of Hong Kong

**Correspondence on submission:** Martin CS Wong BMedSc (Hons), MSc (Hons), MBChB, MD, MPH, MBA, FRSPH, FRSP, FRIPH, FRACGP, FHKCFP, DCH, FHKAM, FHKAN

**Corresponding Author:** Henry LY Chan MBChB (CUHK), MD (CUHK), FRCP (Edin), FRCP (Lond), FHKCP, FHKAM (Med)

Professor, Department of Medicine and Therapeutics; Head, Division of Gastroenterology and Hepatology; Director, Institute of Digestive Disease; Director, Center for Liver Health, Faculty of Medicine, The Chinese University of Hong Kong

**Phone:** 852-26321506; **Fax:** 852-26373852; **Email:** [hlychan@cuhk.edu.hk](mailto:hlychan@cuhk.edu.hk)

# Supplementary Figure 1 Temporal trends in the incidence and mortality of liver cancer according to country and gender\*

## 1) Latin America and the Caribbean

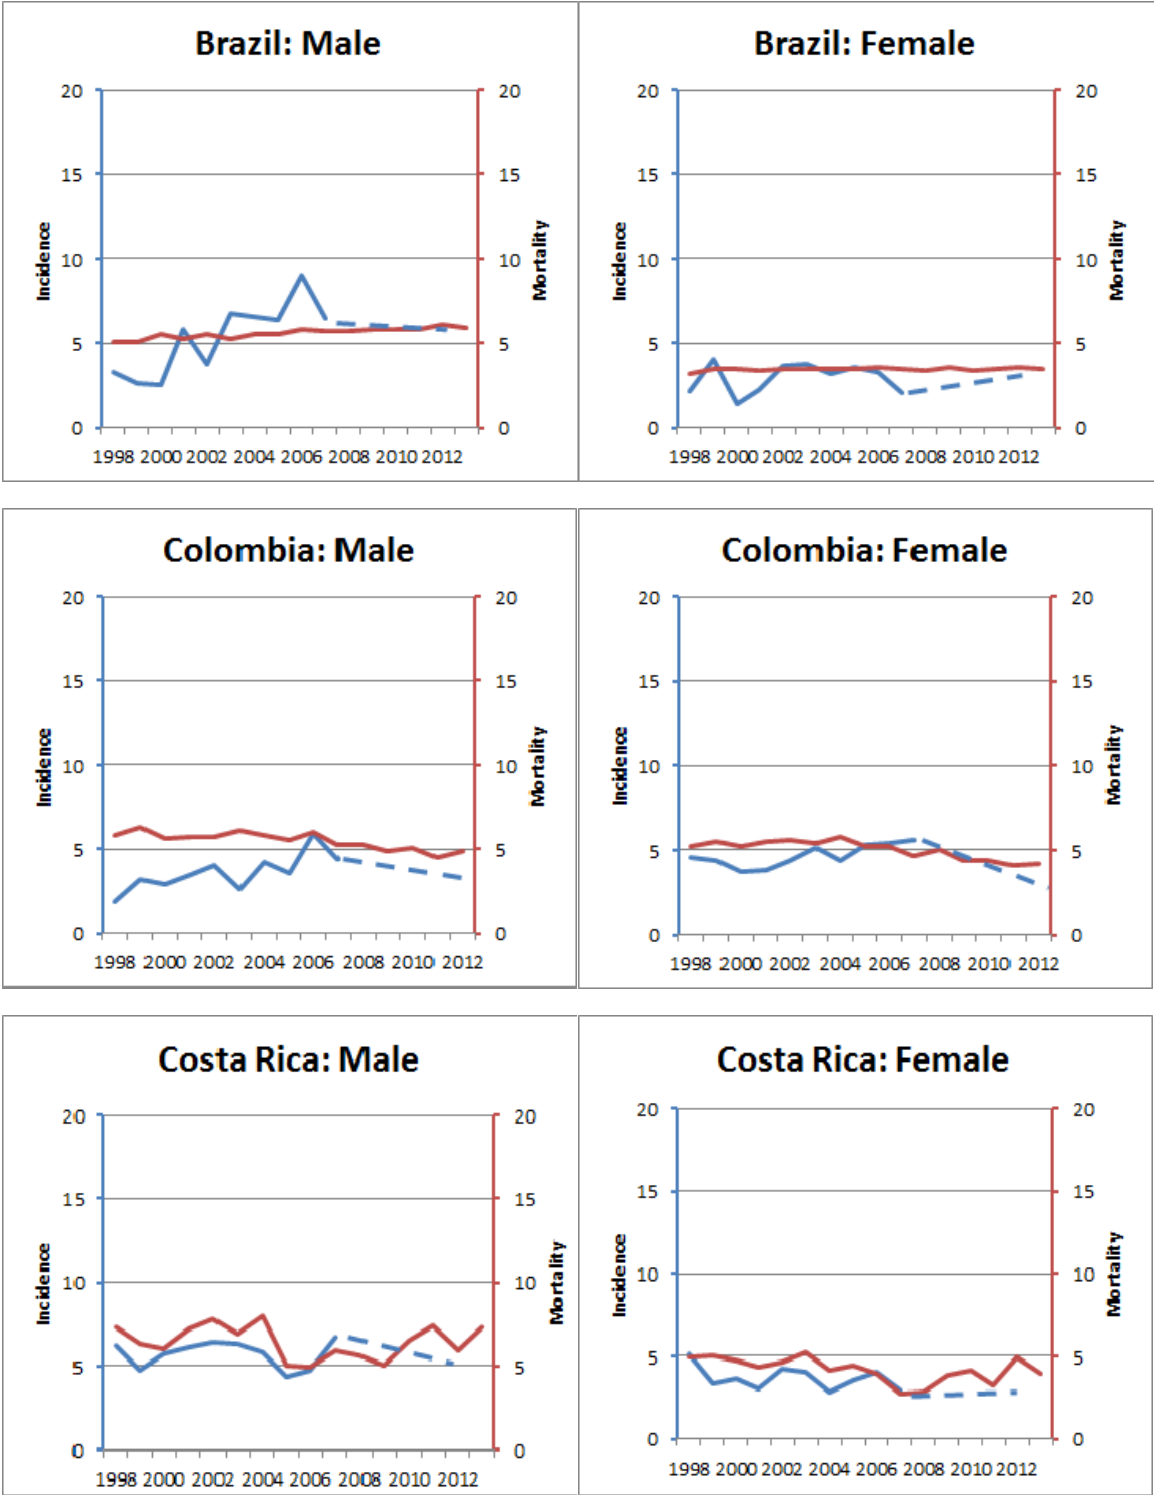

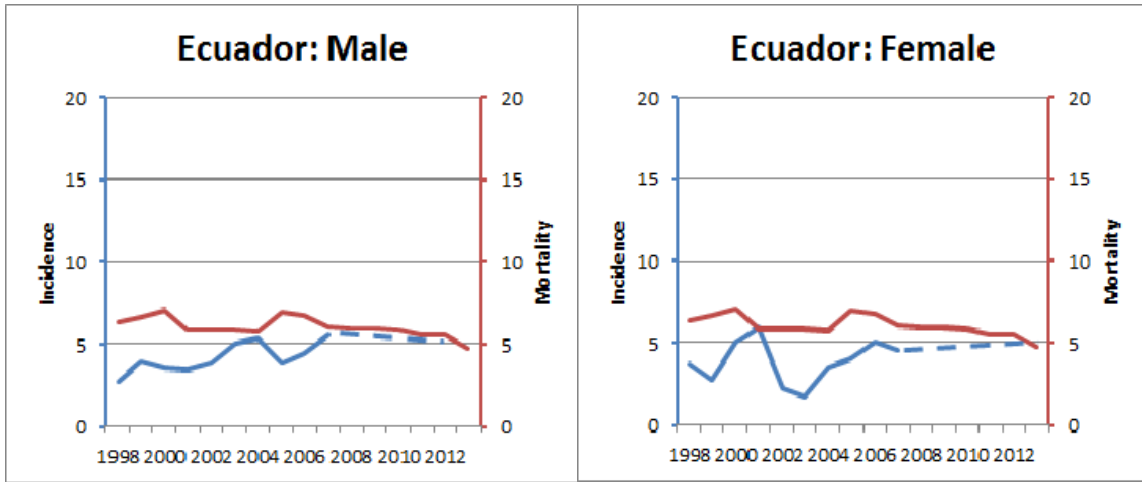

## 2) Northern America

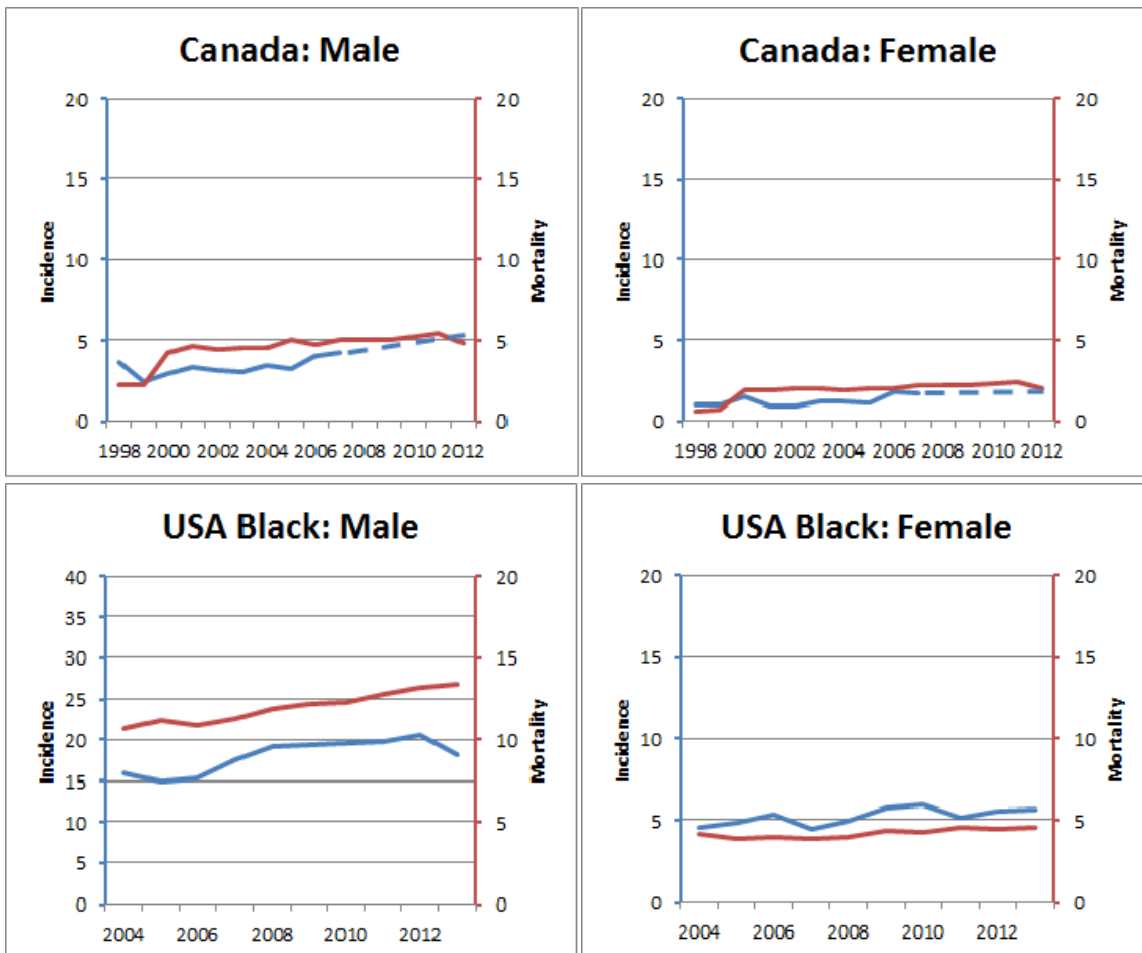

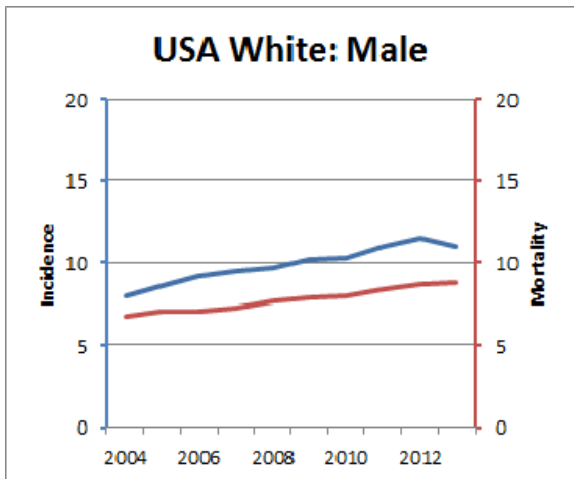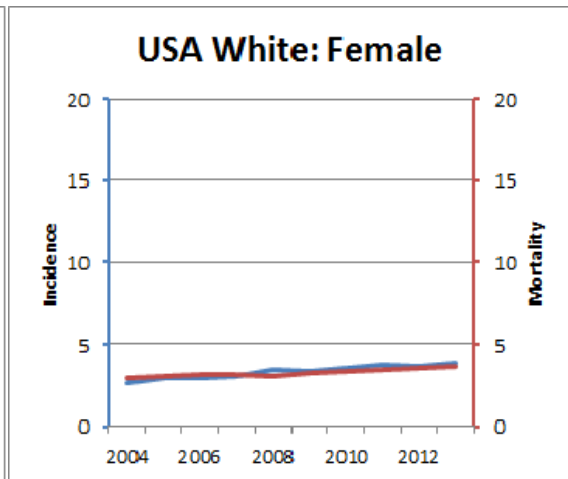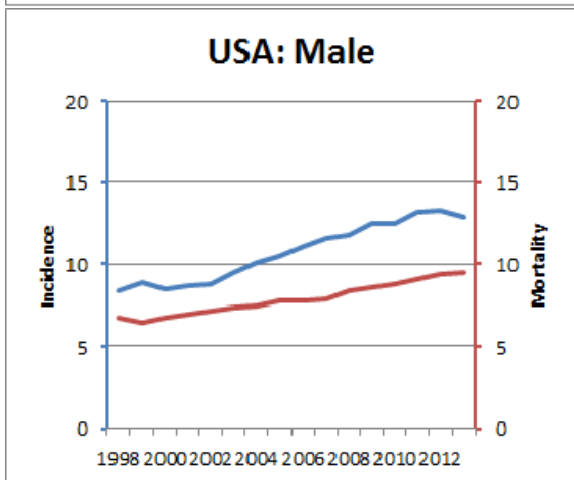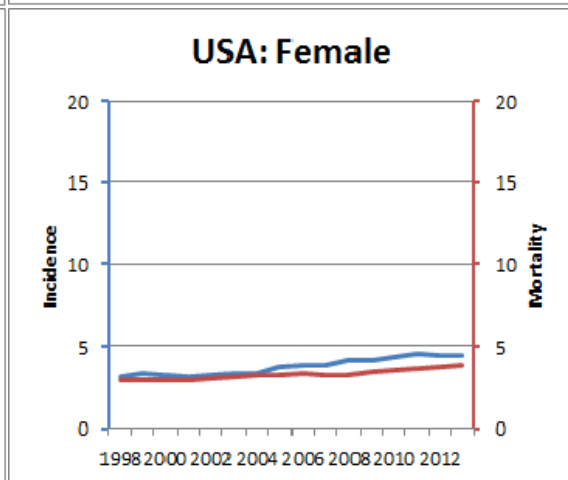

### 3) Asia

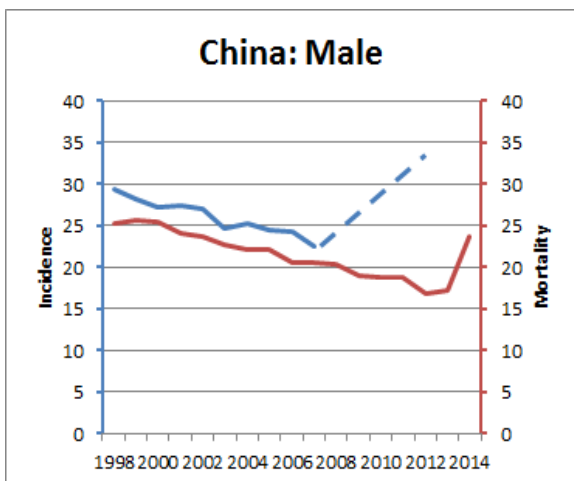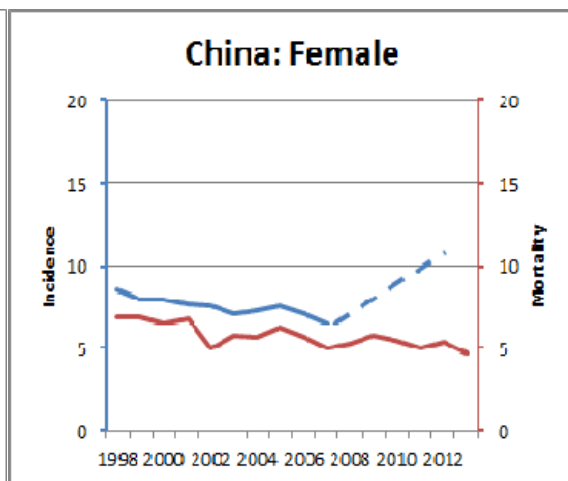

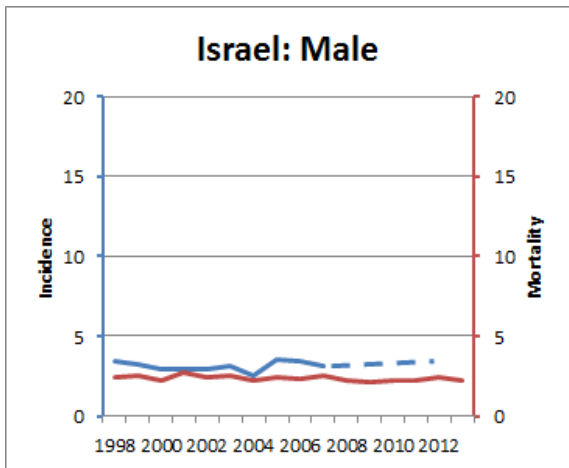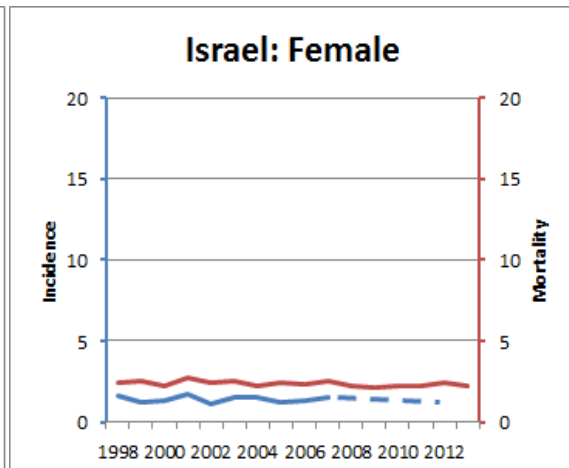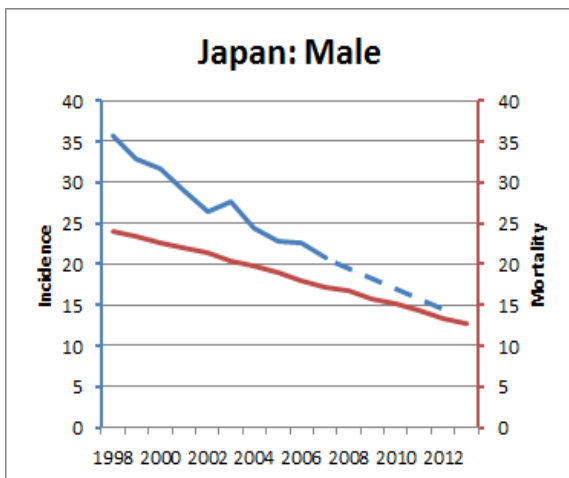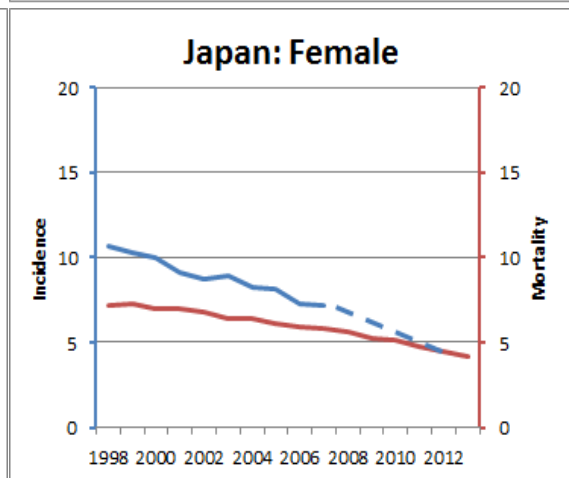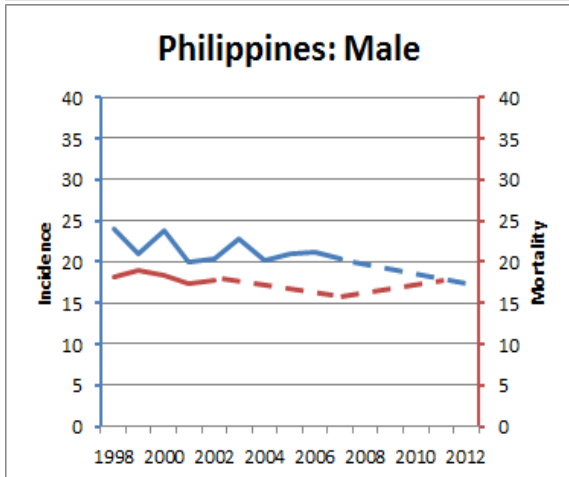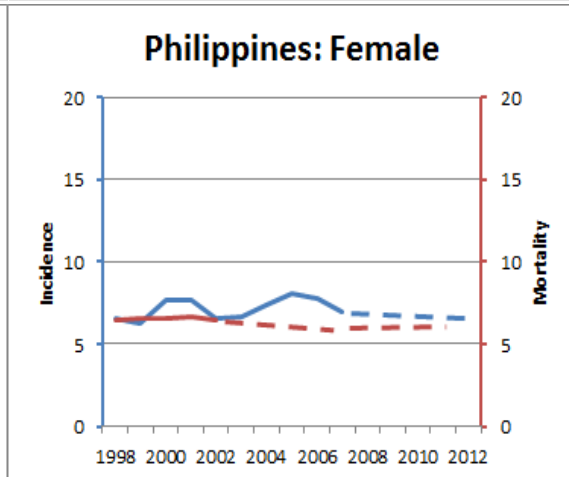

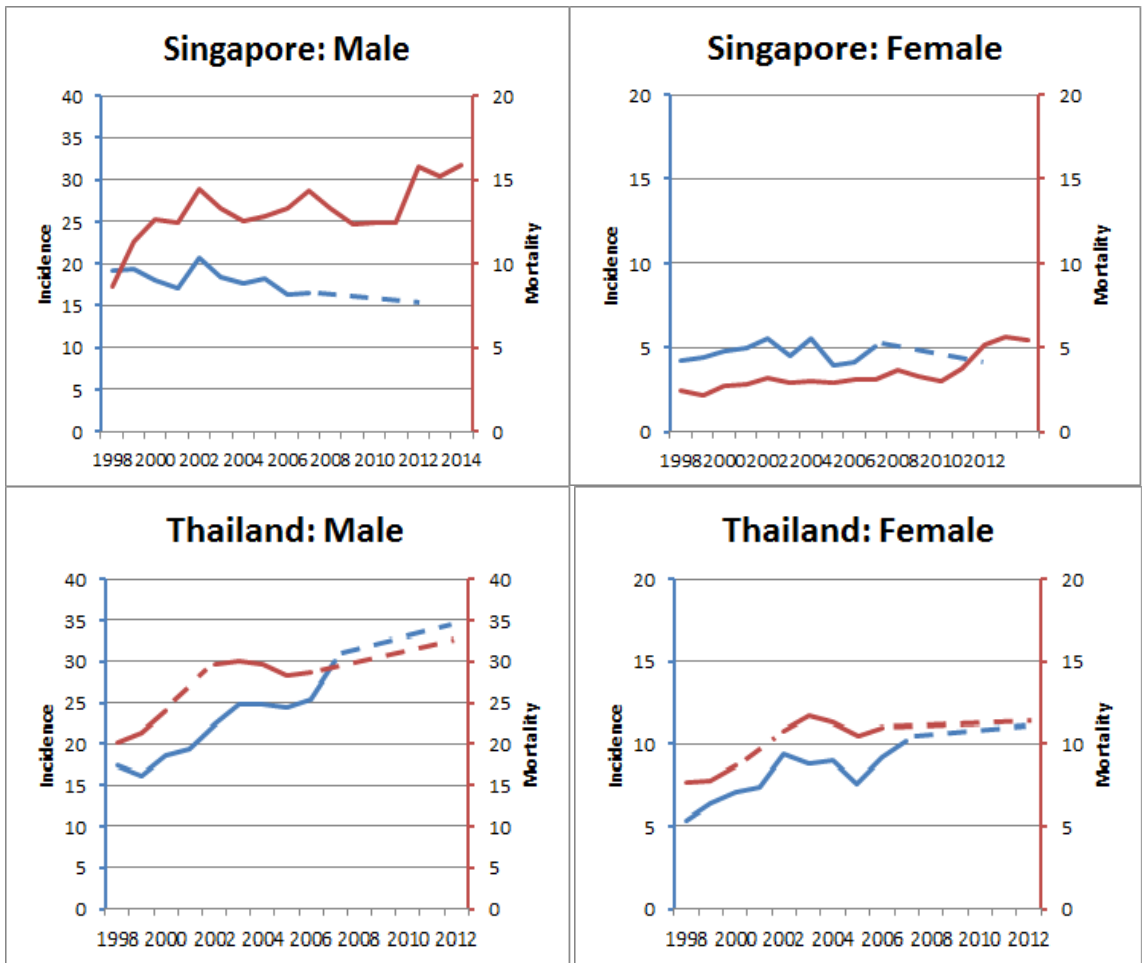

#### 4) Oceania

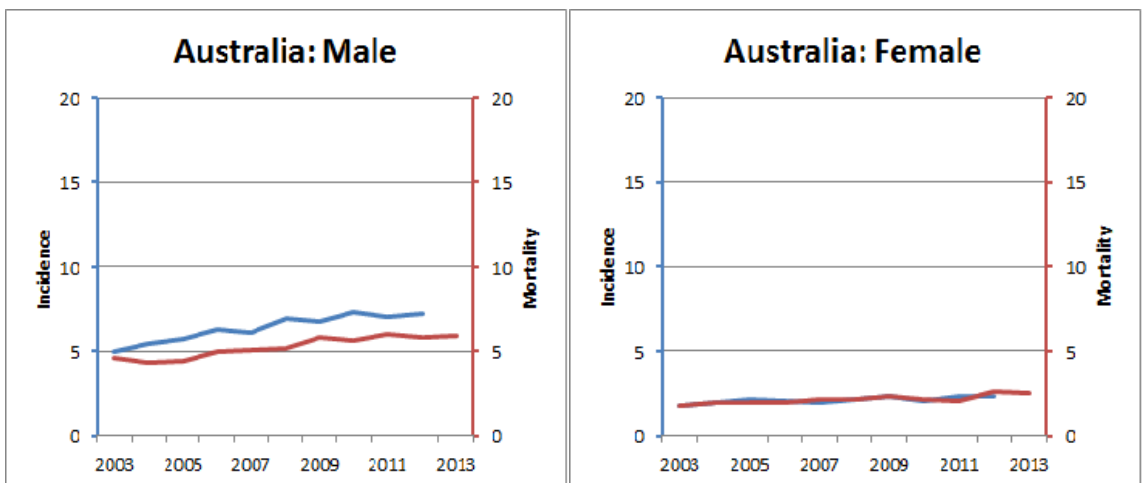

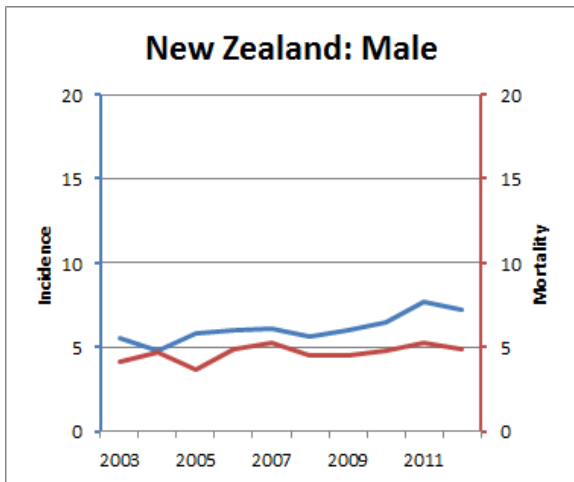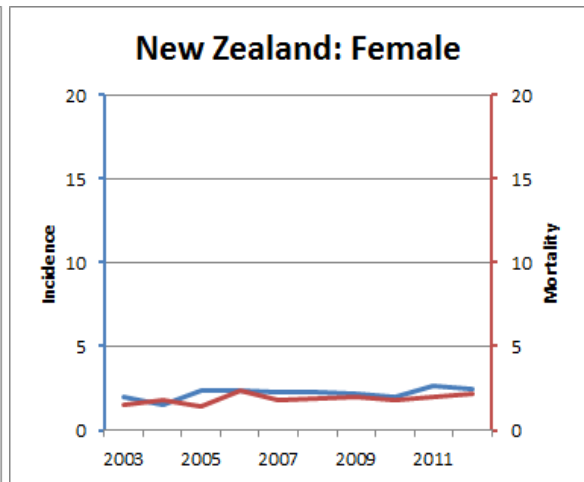

## 5) Northern Europe

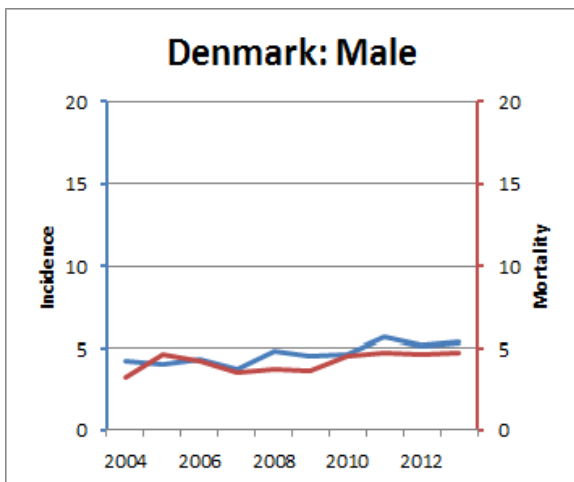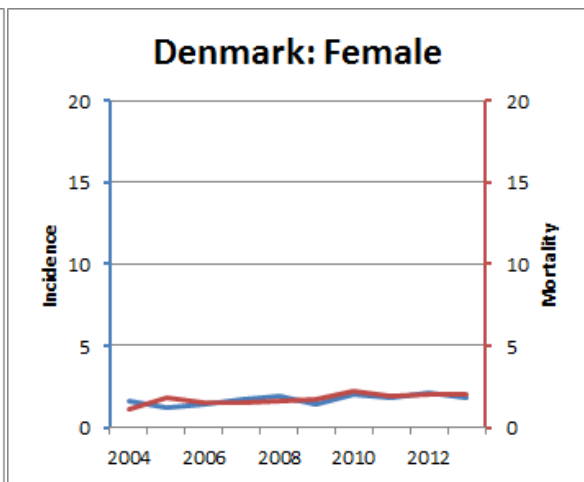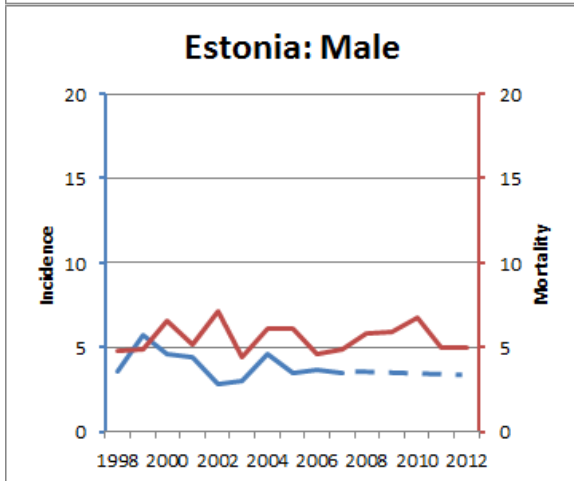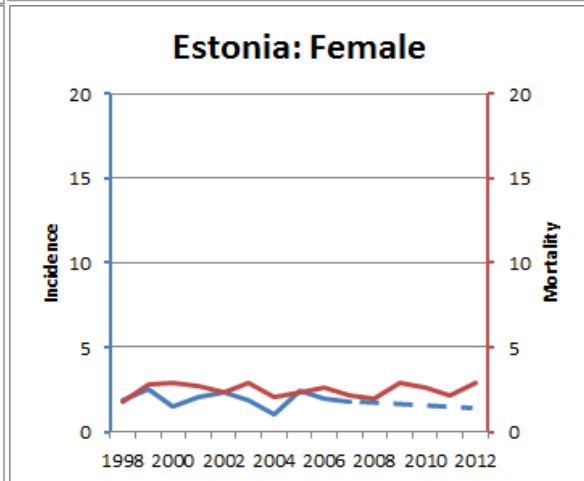

**Finland: Male**

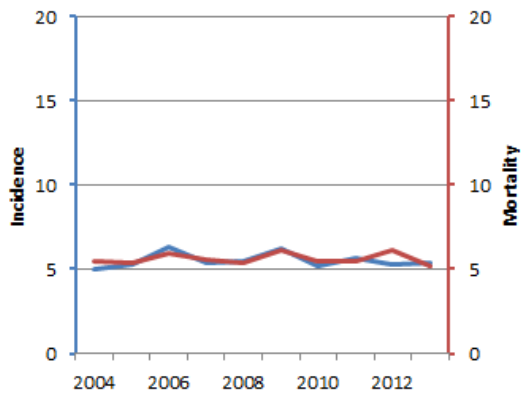

**Finland: Female**

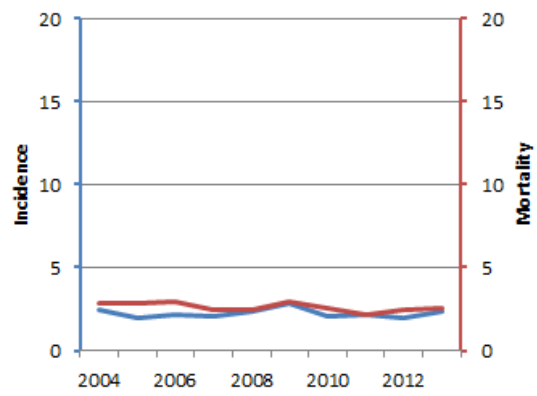

**Iceland: Male**

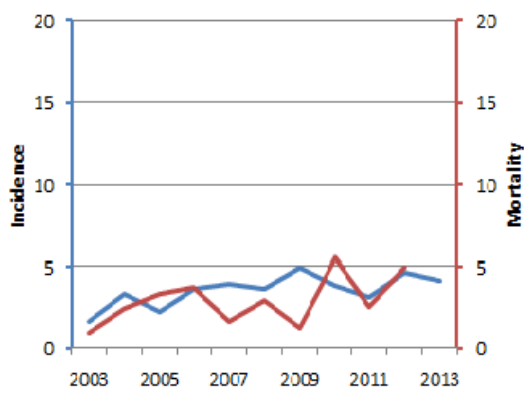

**Iceland: Female**

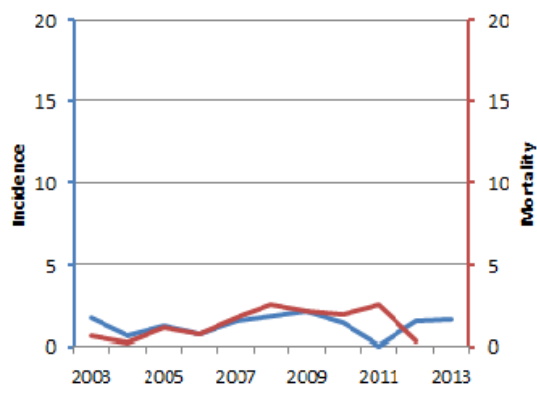

**Latvia: Male**

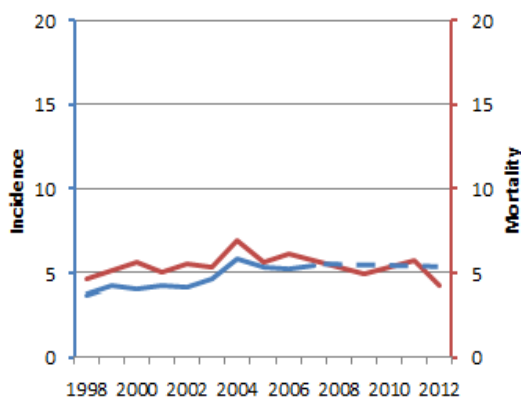

**Latvia: Female**

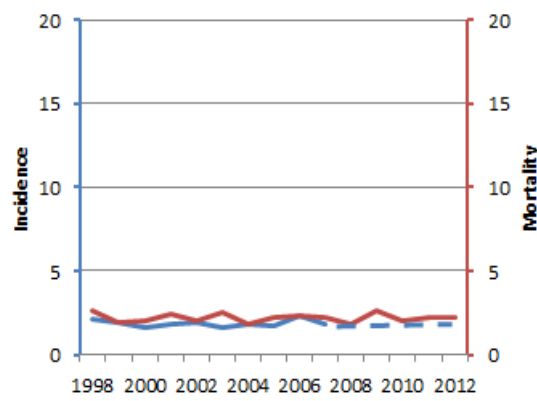



**Lithuania: Male**

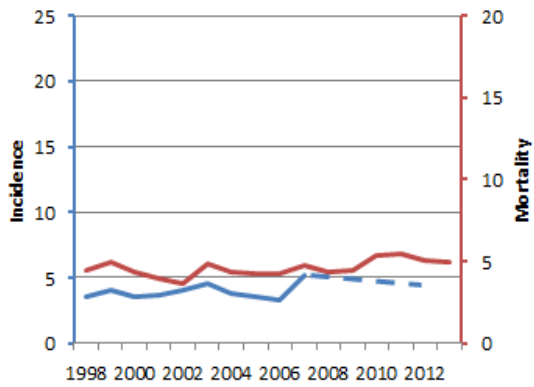

**Lithuania: Female**

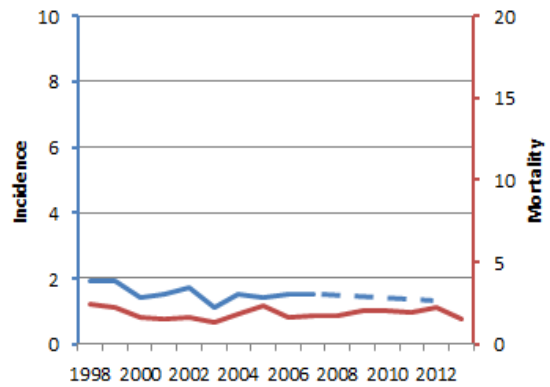

**Norway: Male**

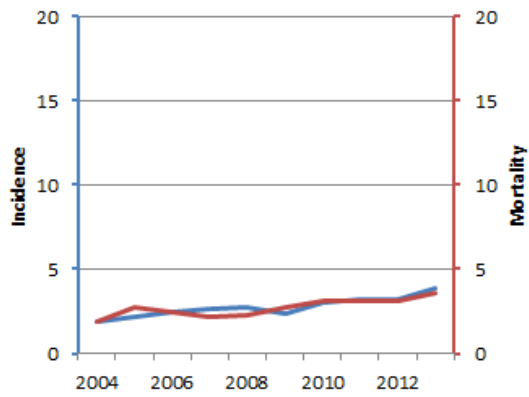

**Norway: Female**

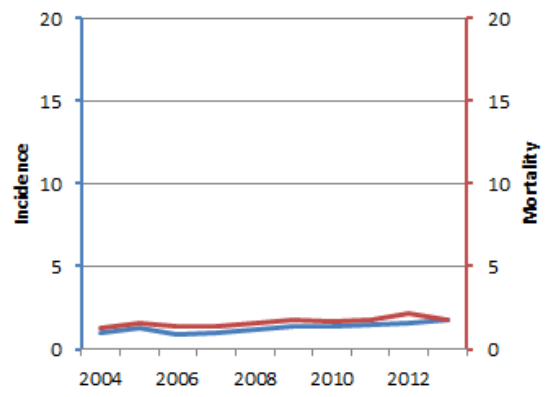

**Sweden: Male**

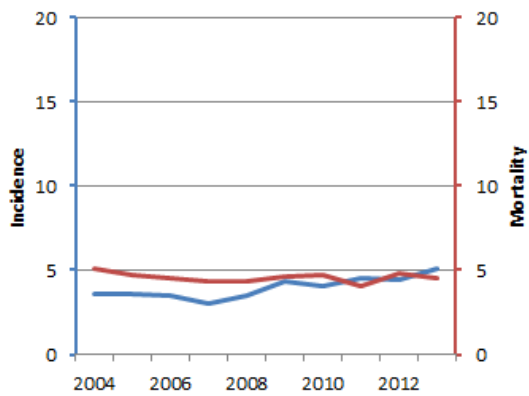

**Sweden: Female**

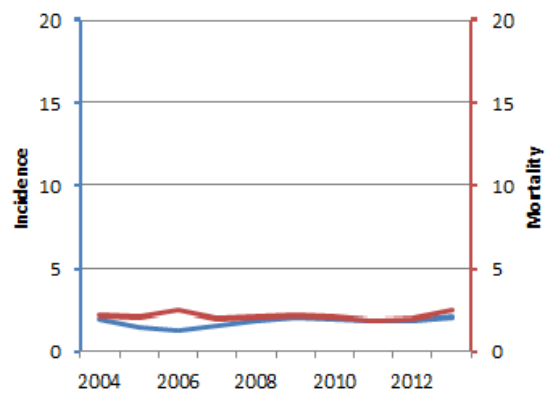

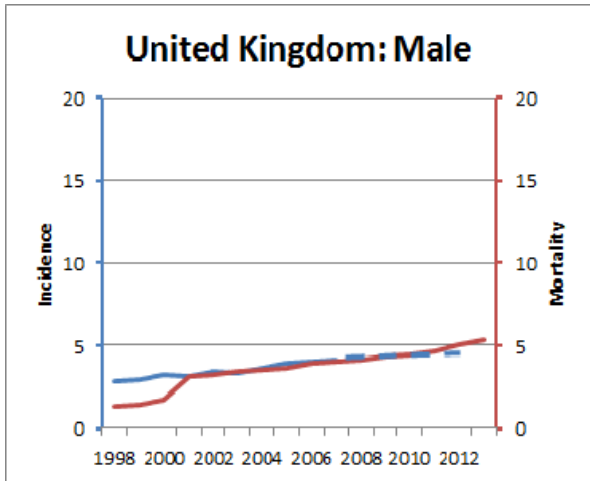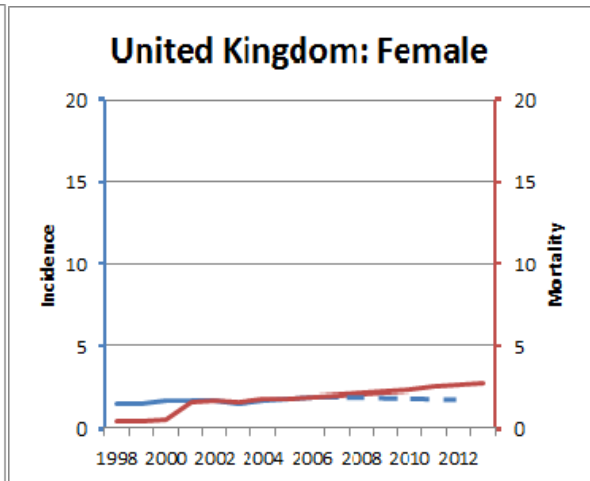

## 6) Western Europe

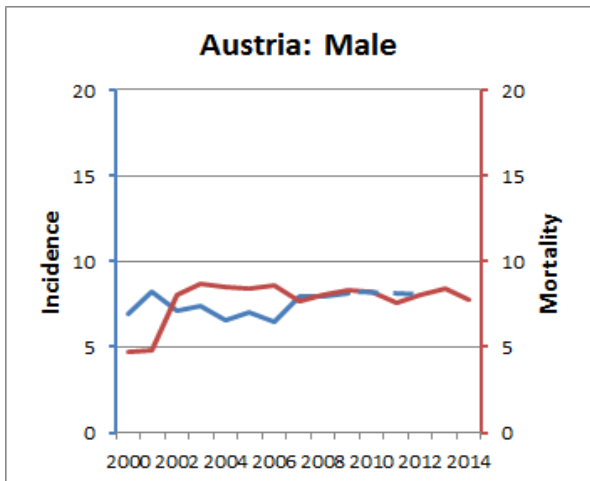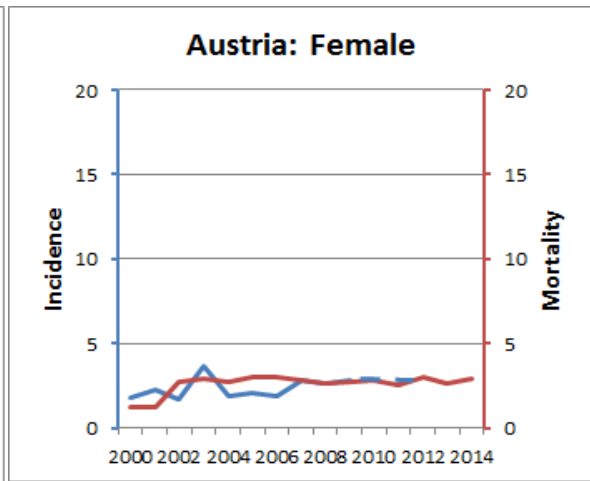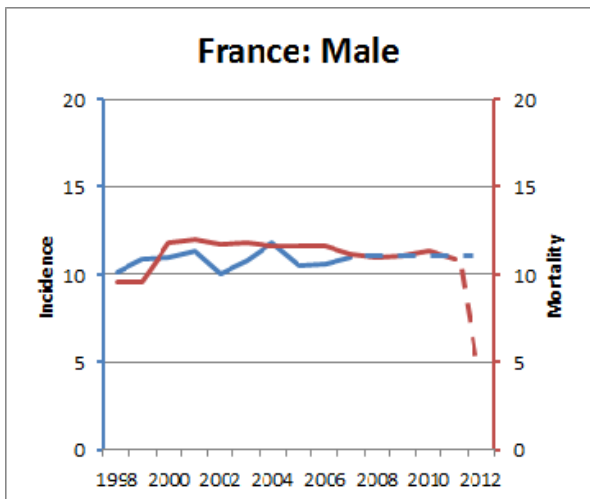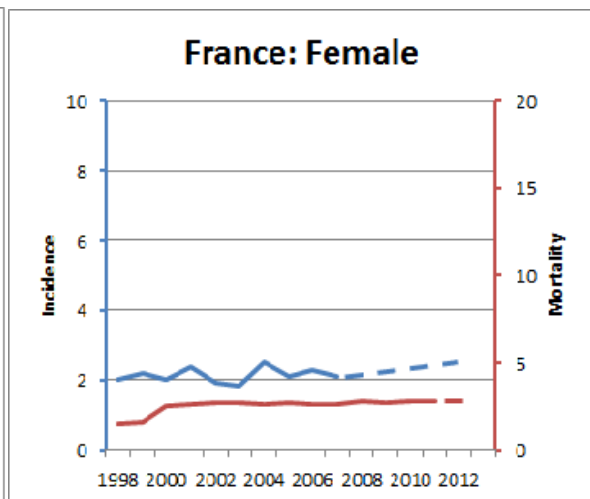

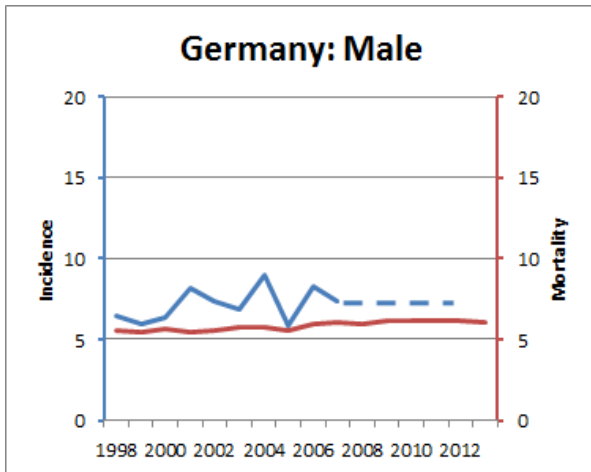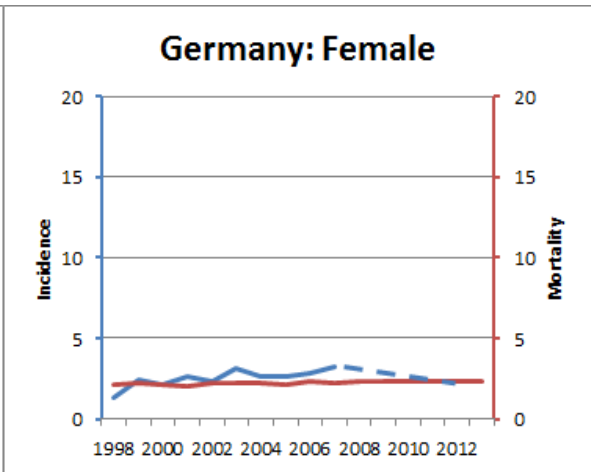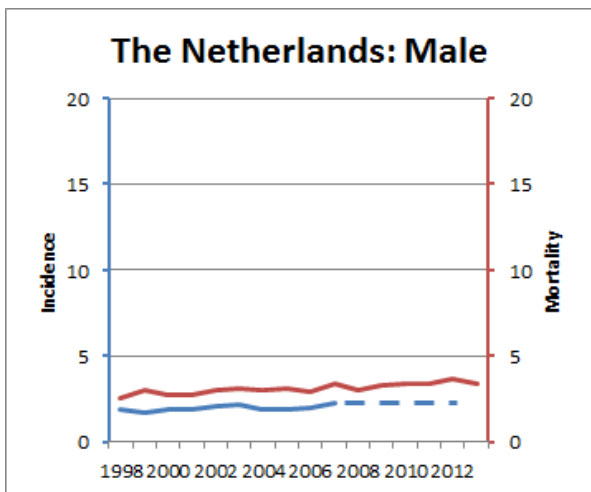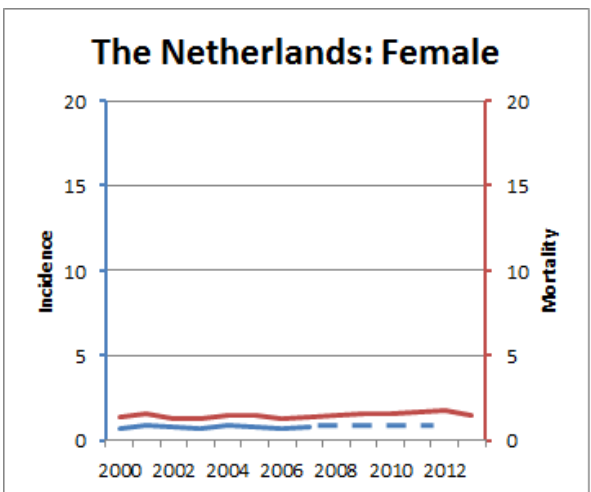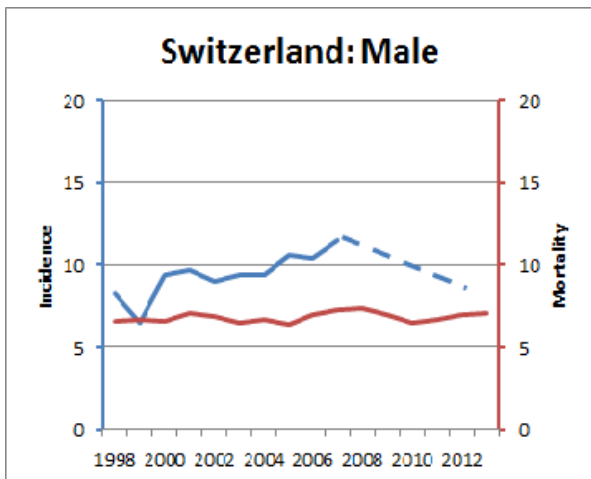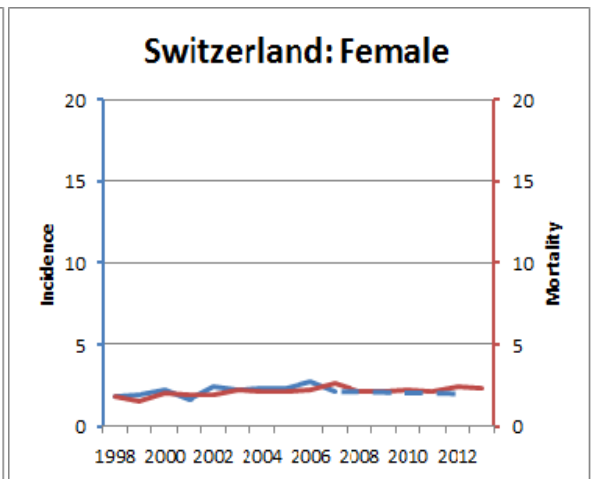

## 7) Southern Europe

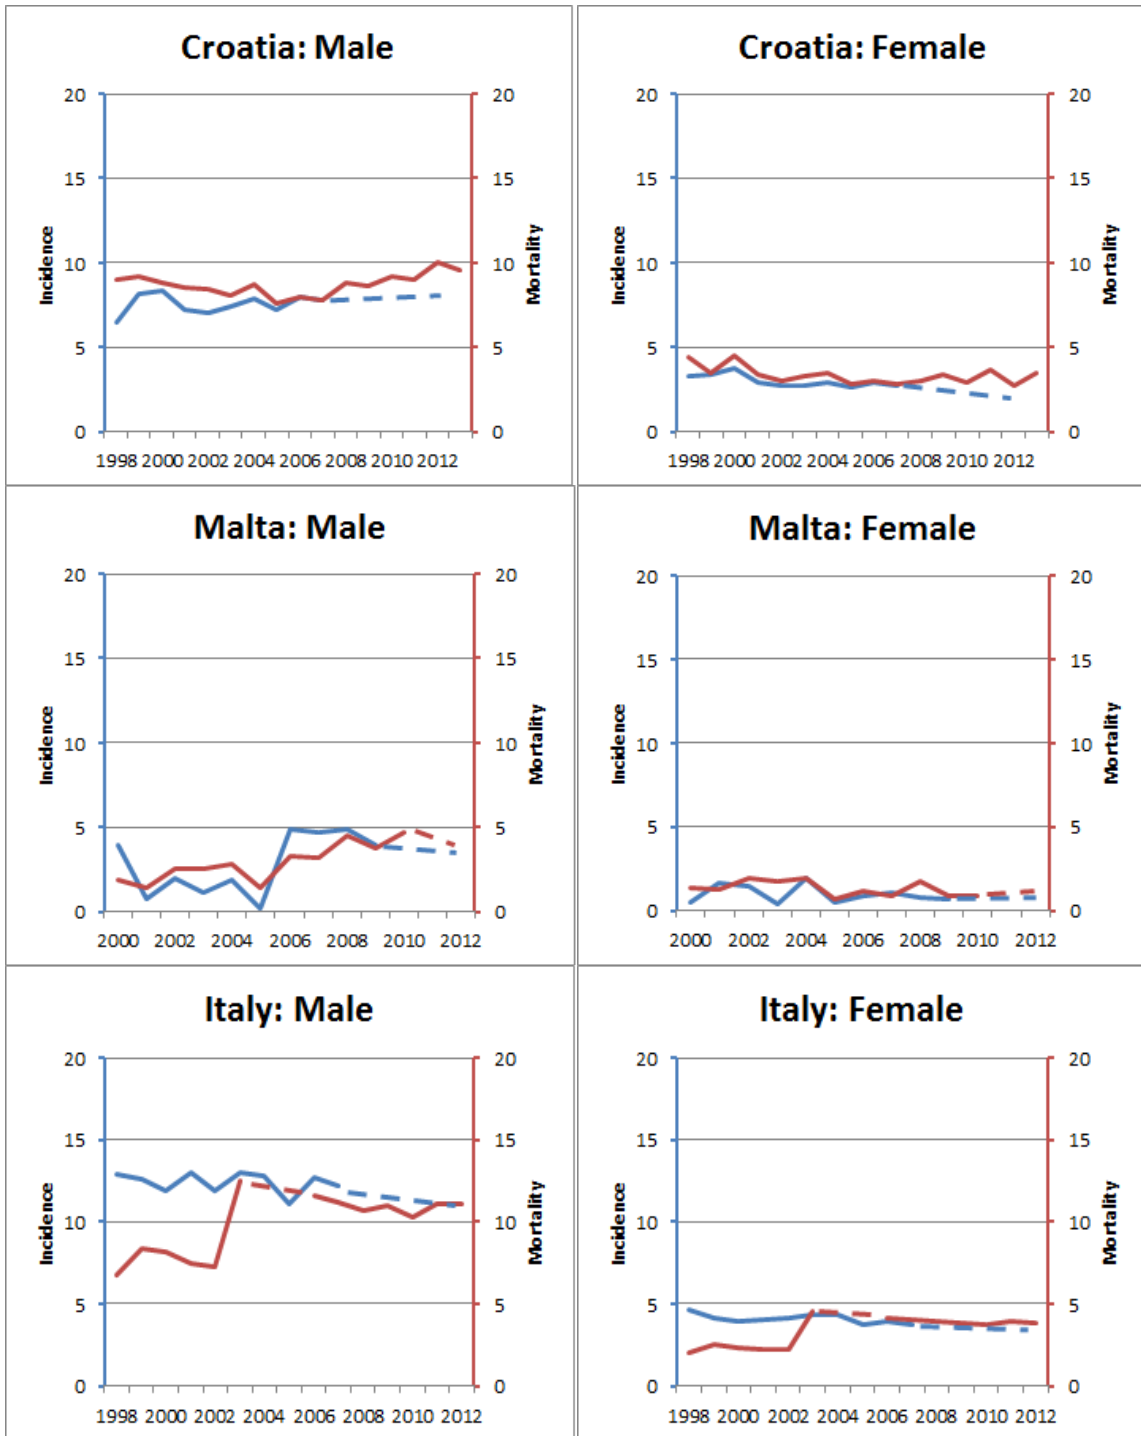

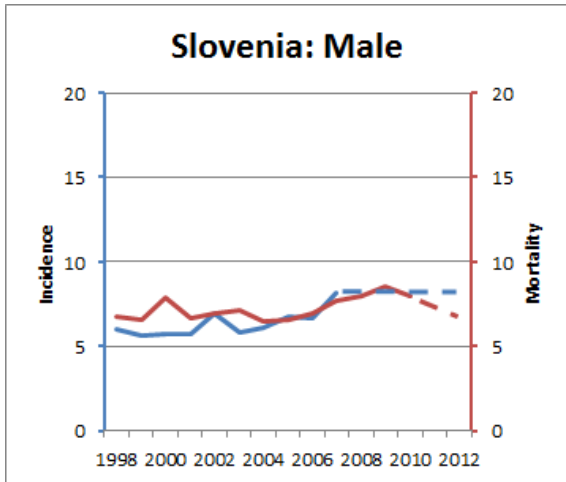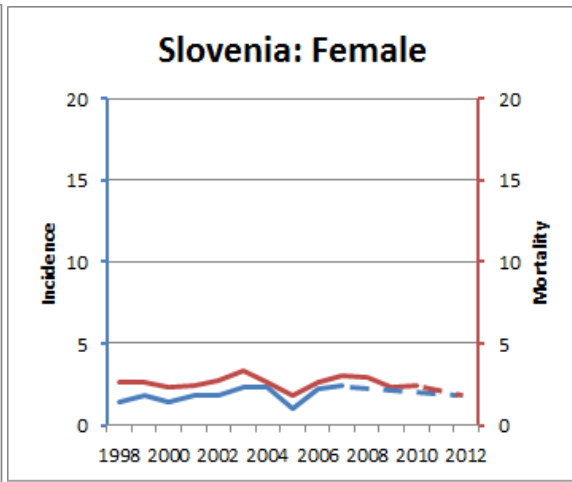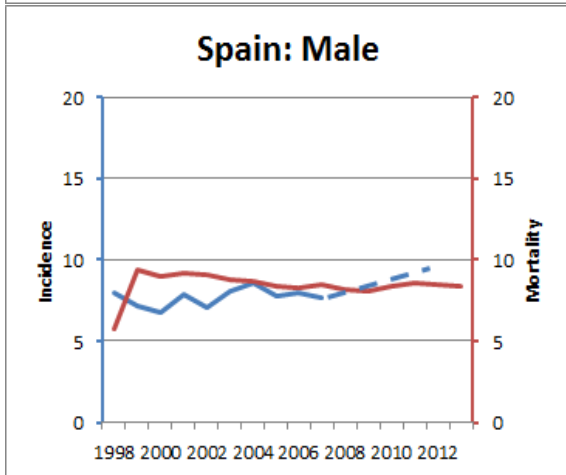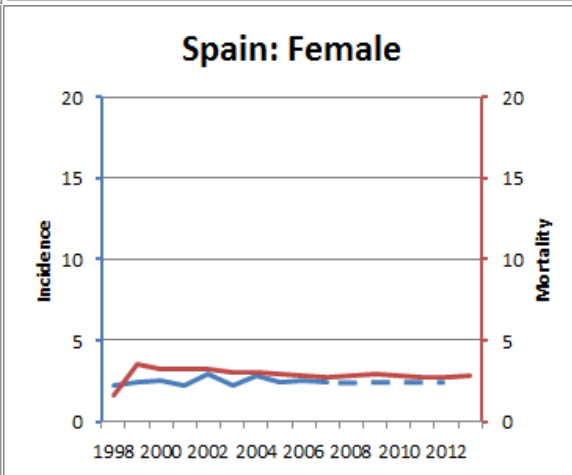

## 8) Eastern Europe

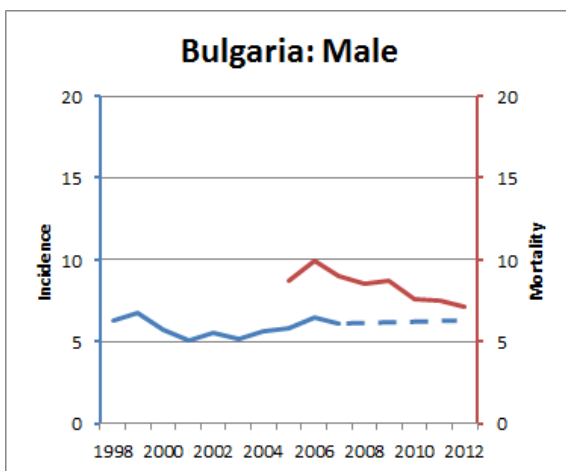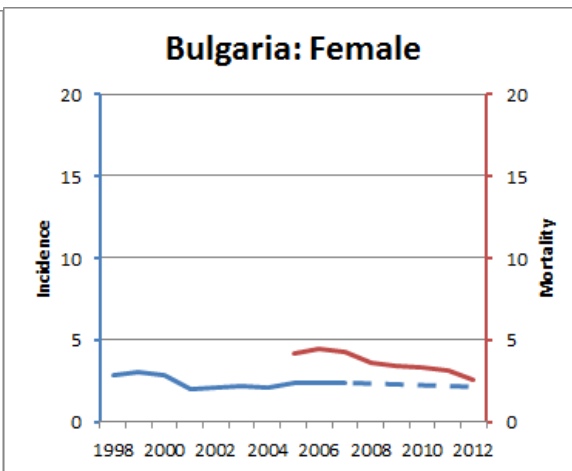

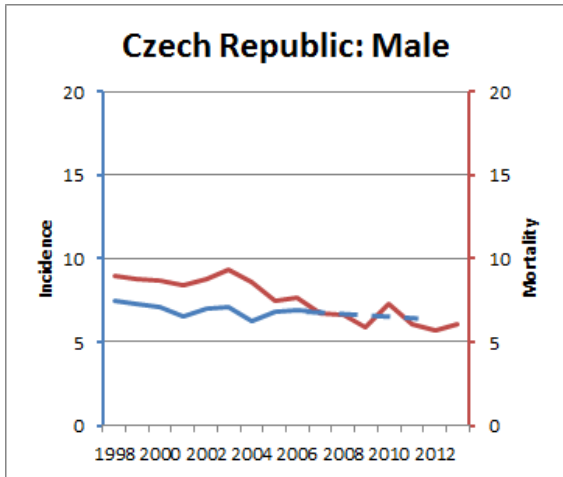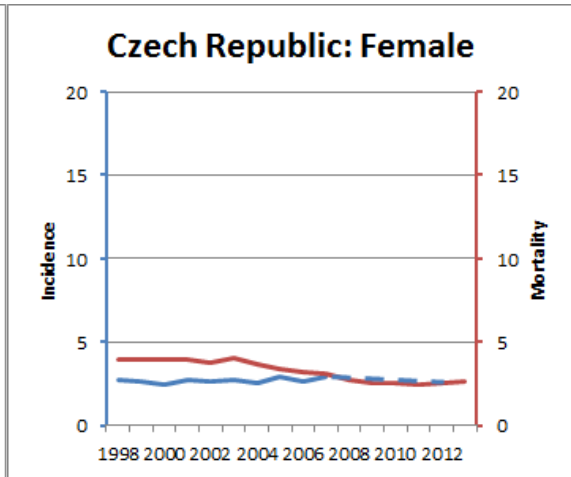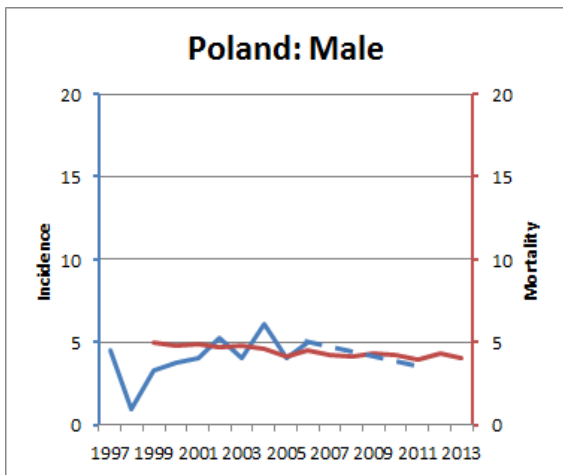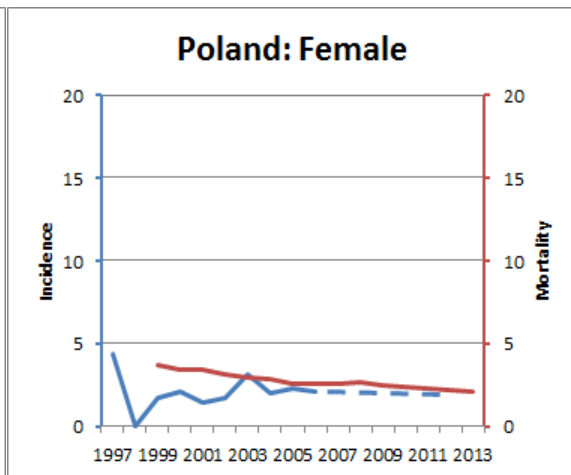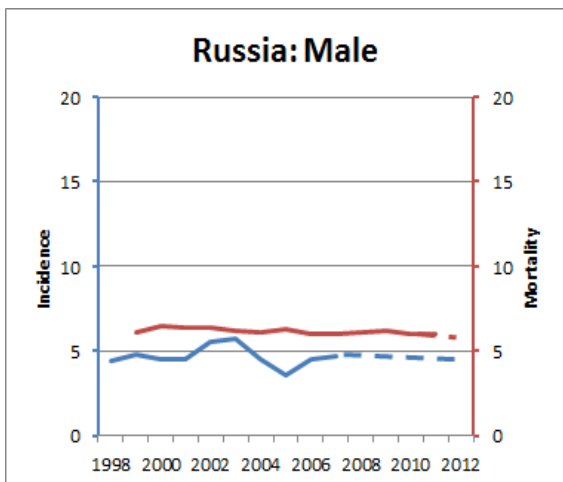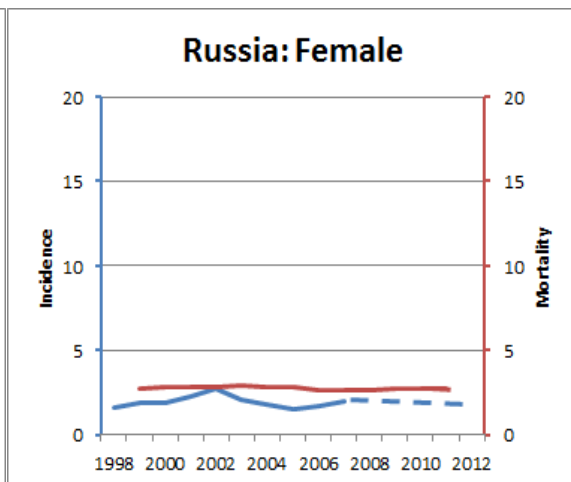

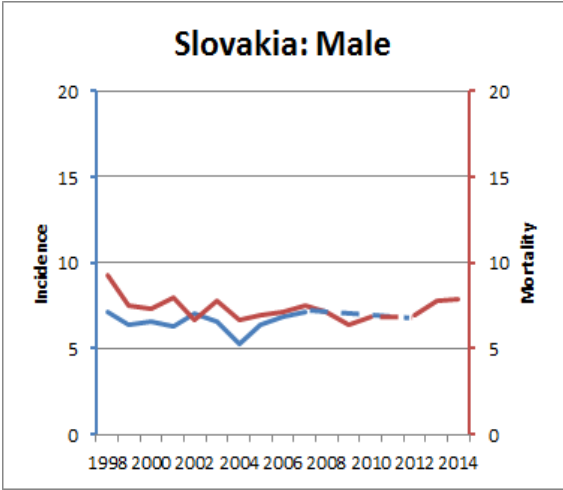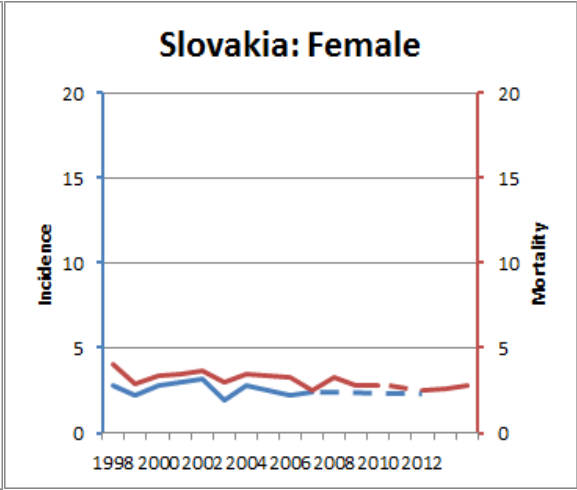

## Supplementary Figure 2 Findings from the joinpoint regression analysis of the global incidence rates of liver cancer (Left: Male, Right: Female)

### Latin America and the Caribbean

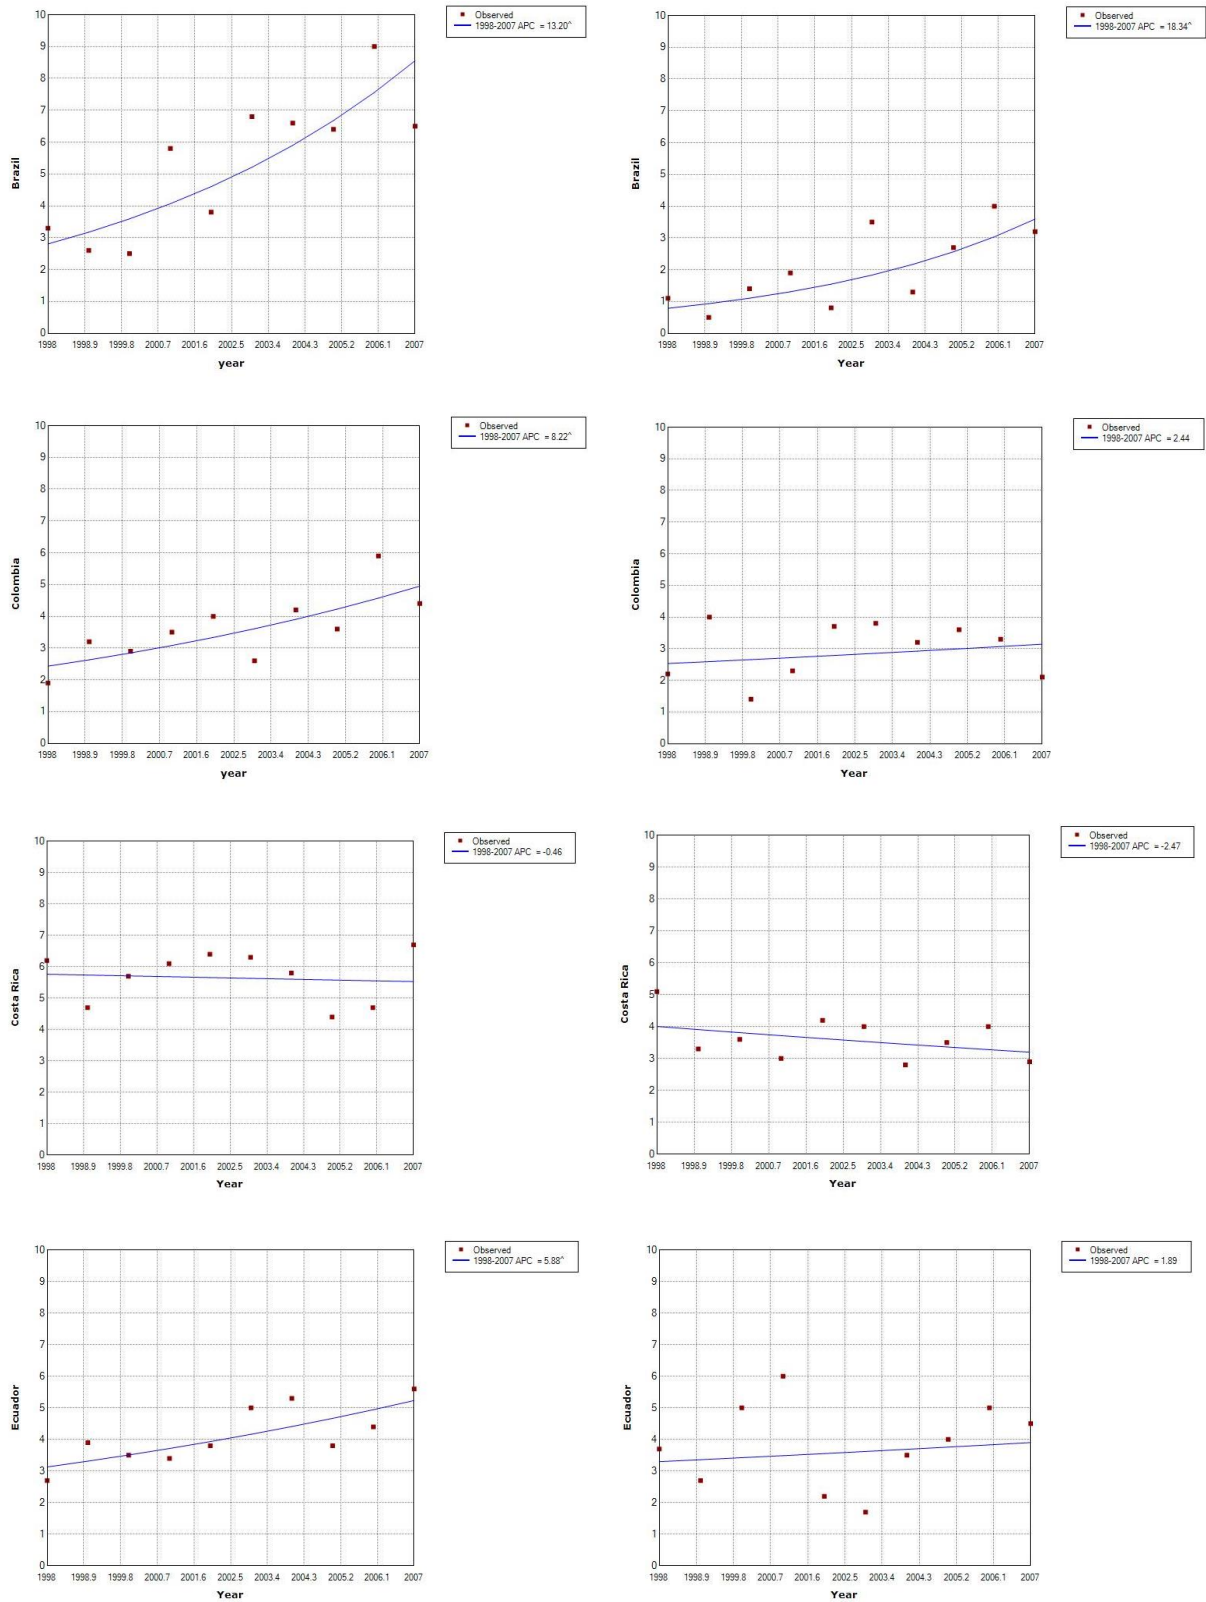



# 1) Northern America

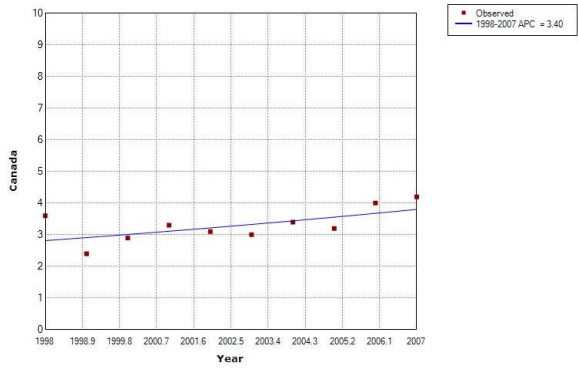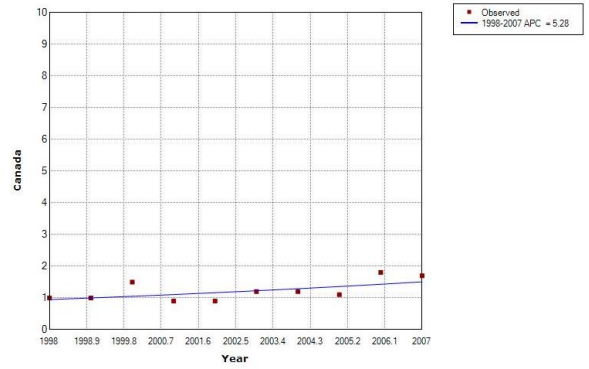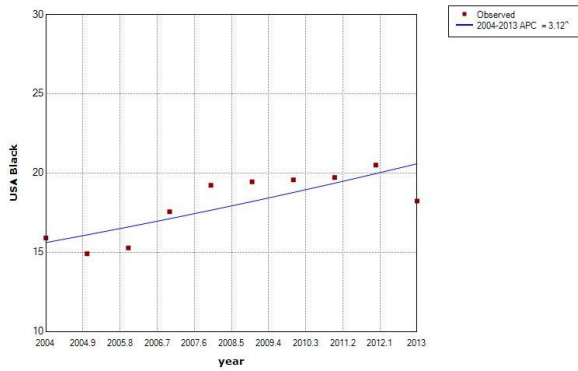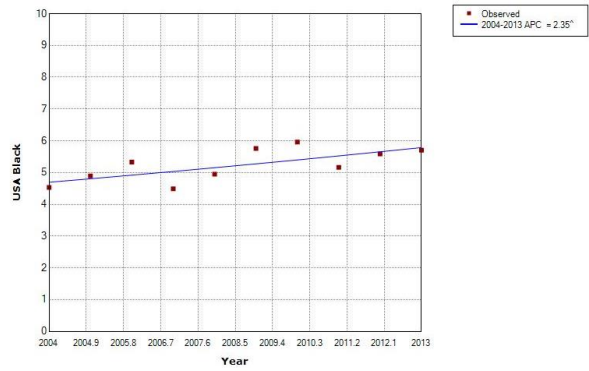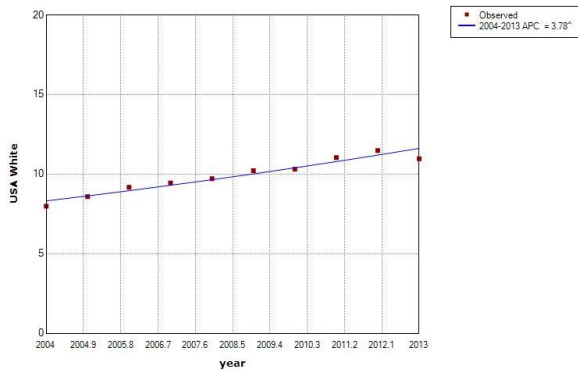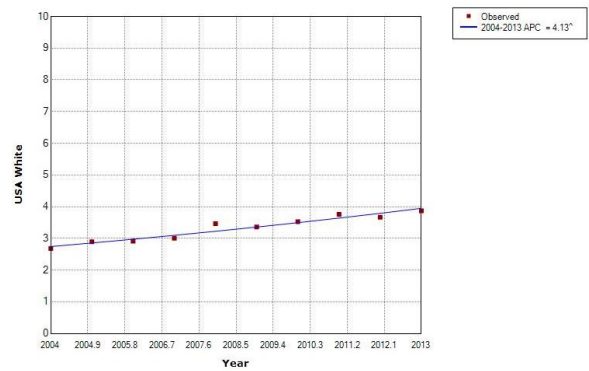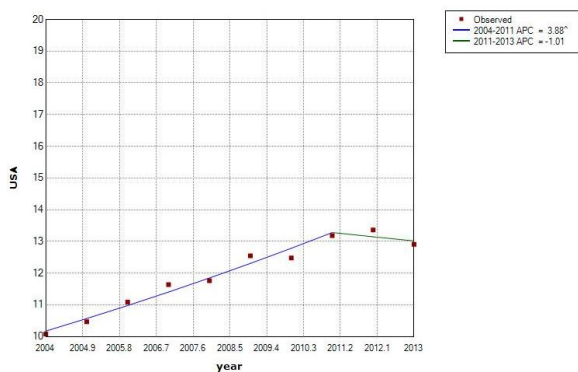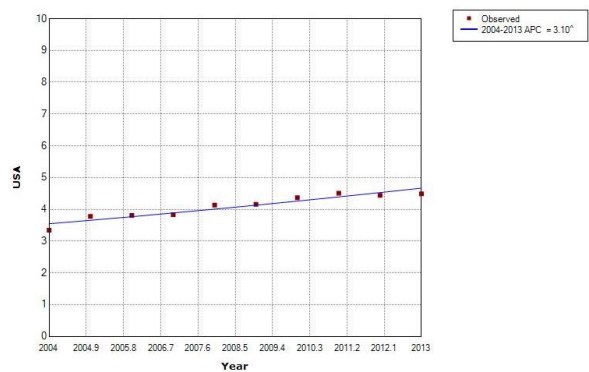

# 2) Asia

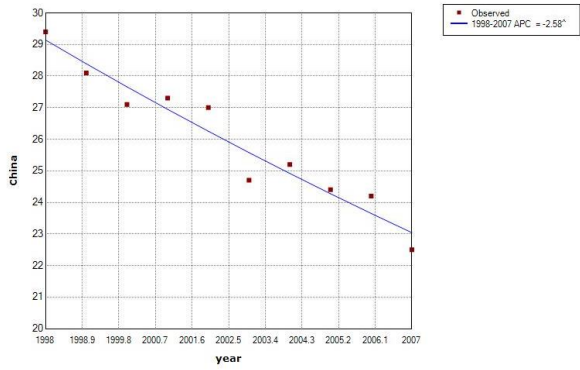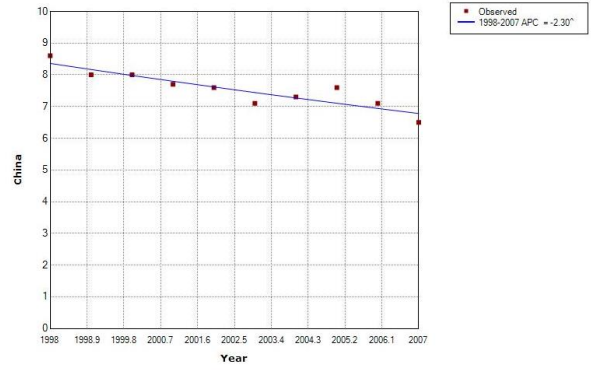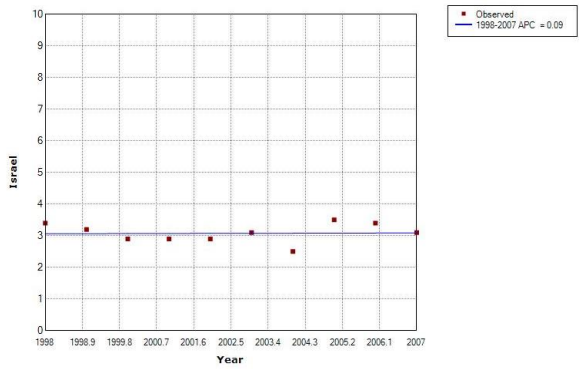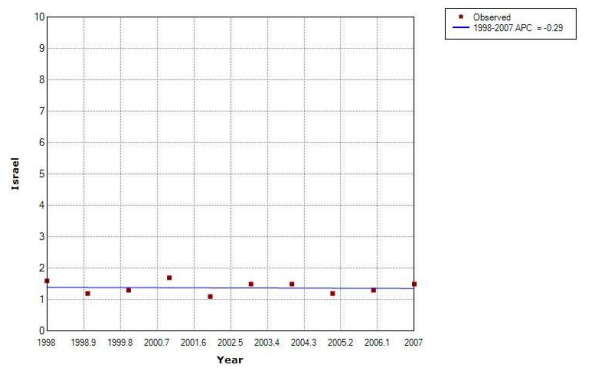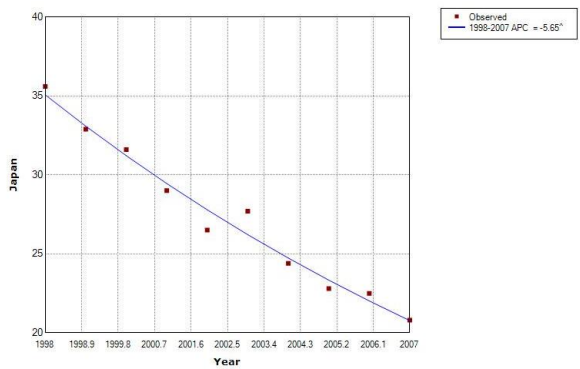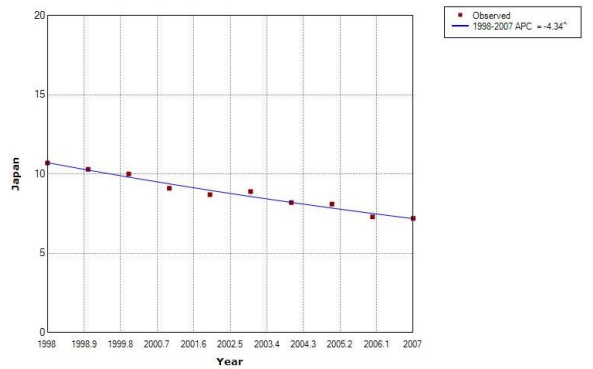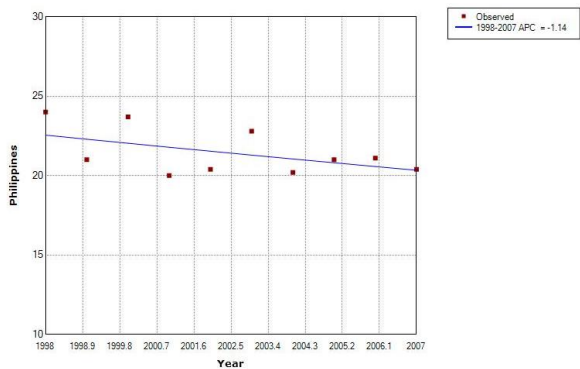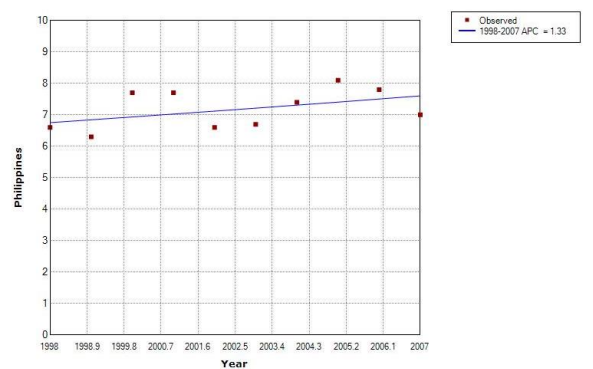

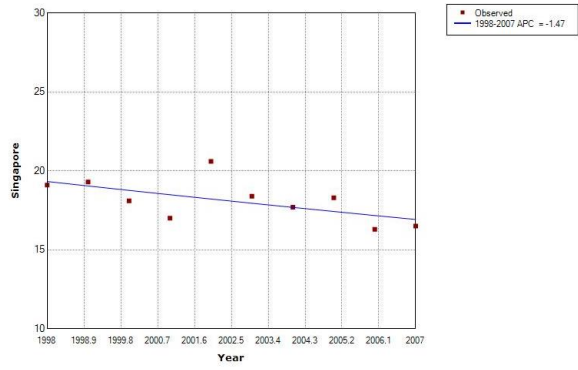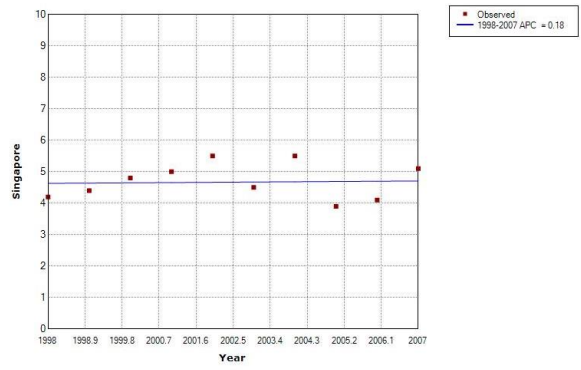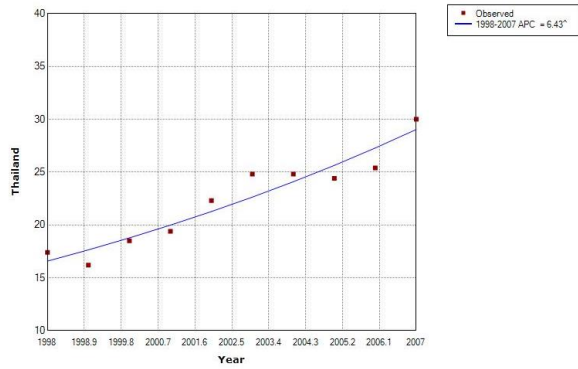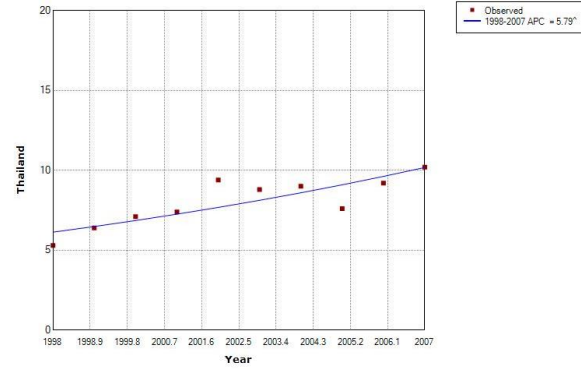

### 3) Oceania

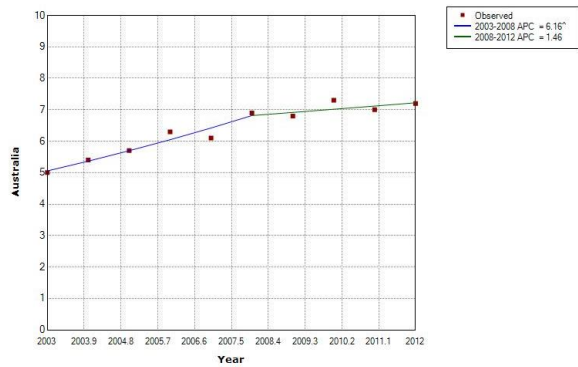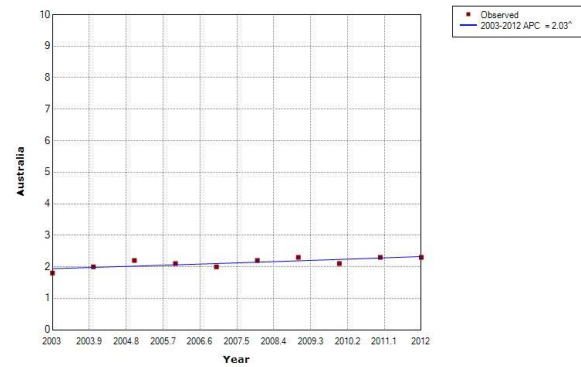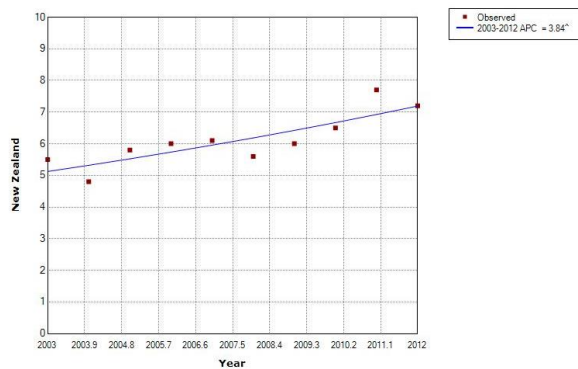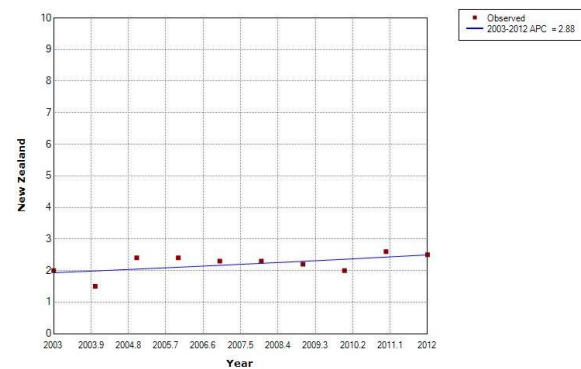

### 4) Northern Europe

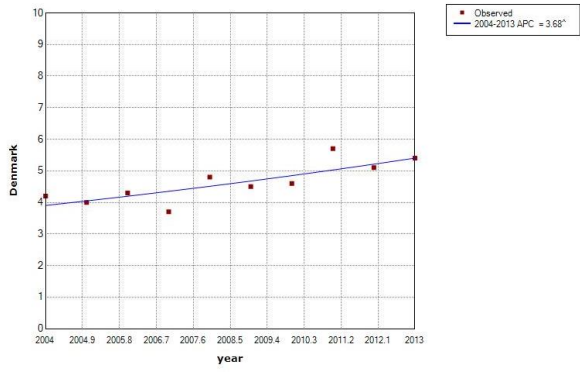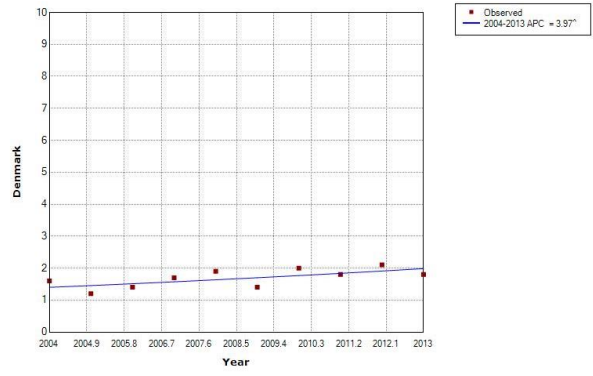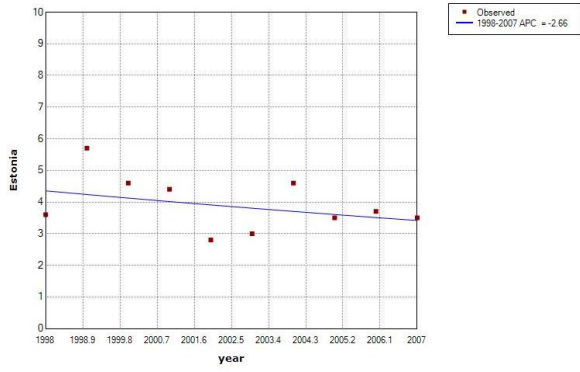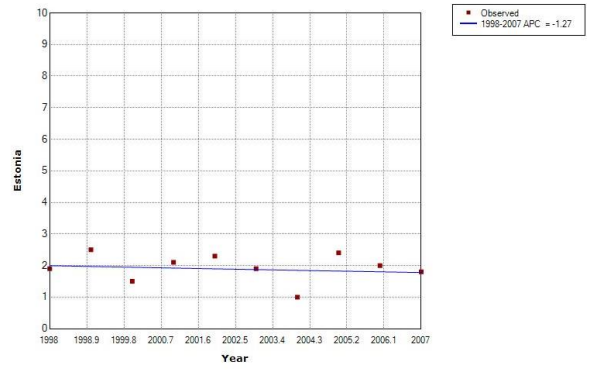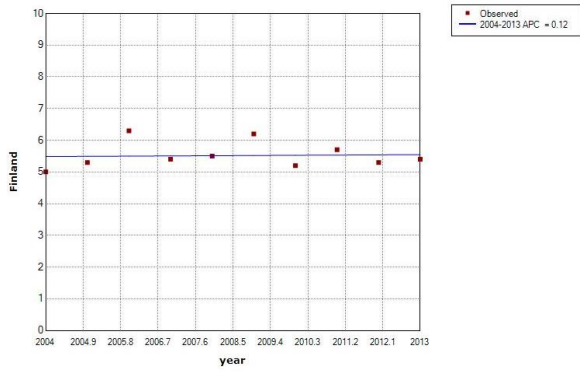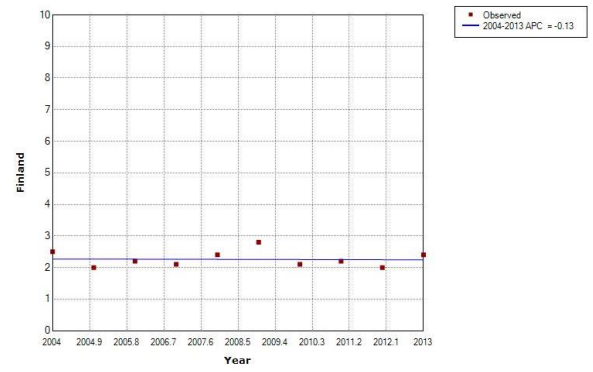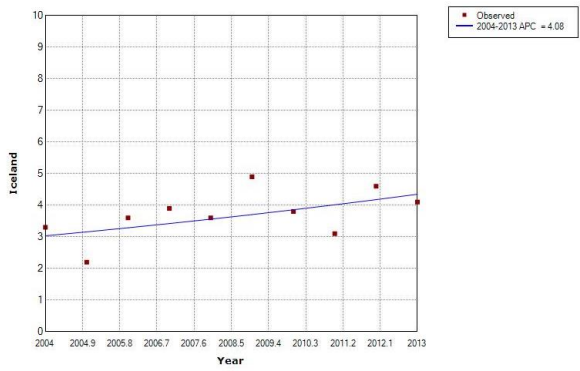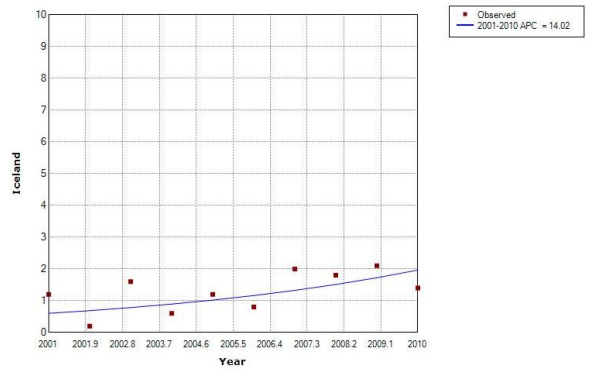

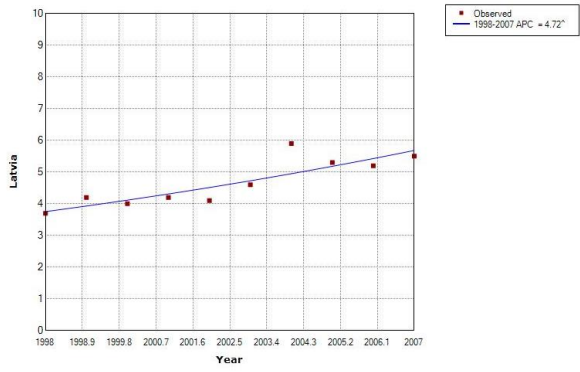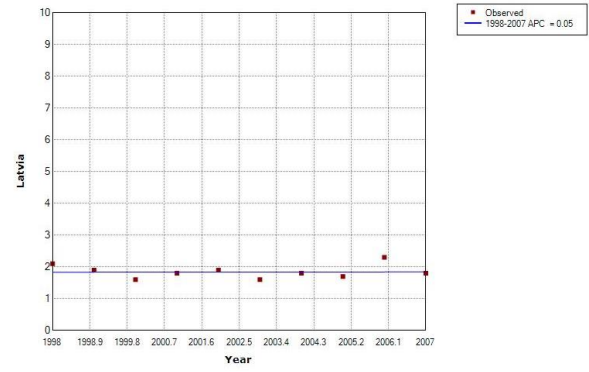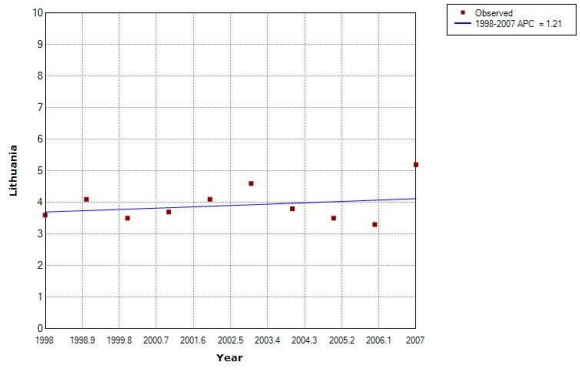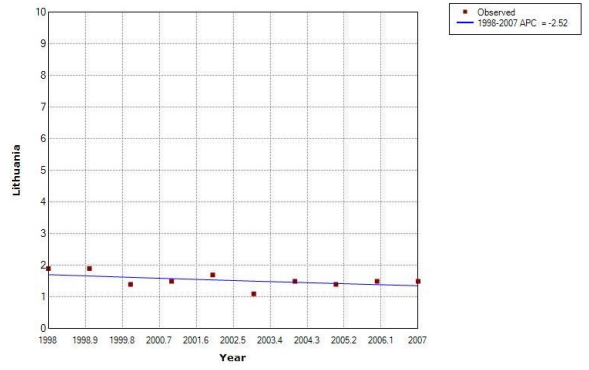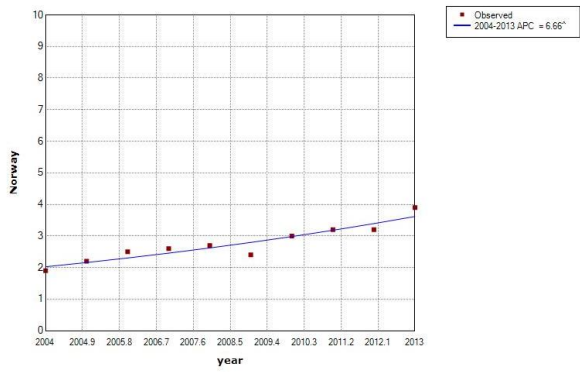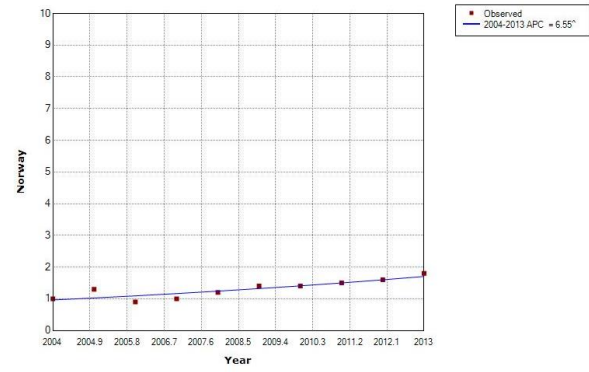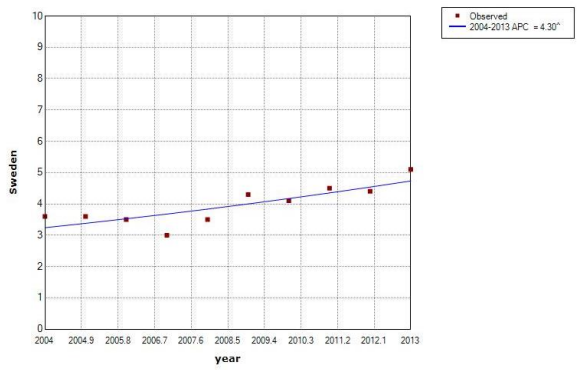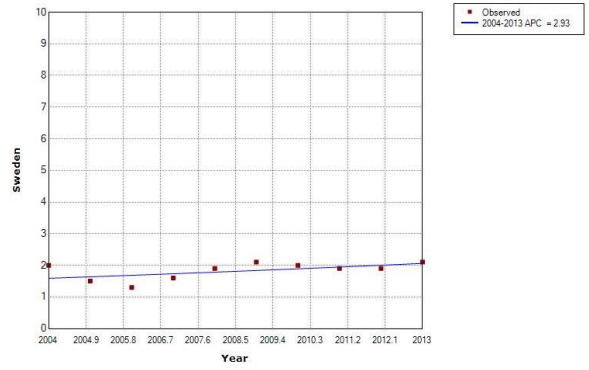

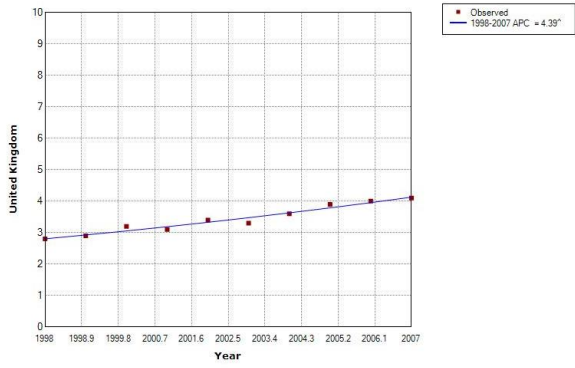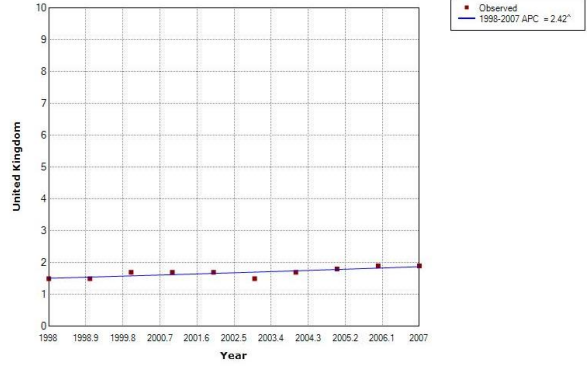

## 5) Western Europe

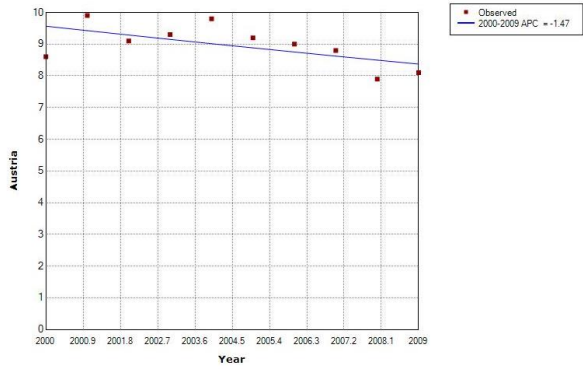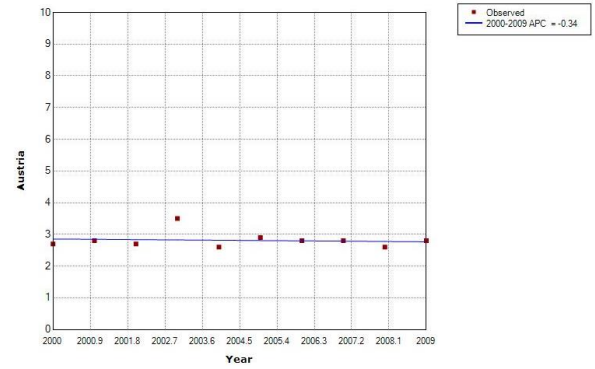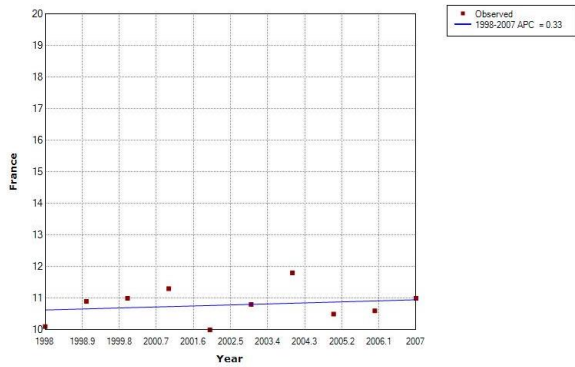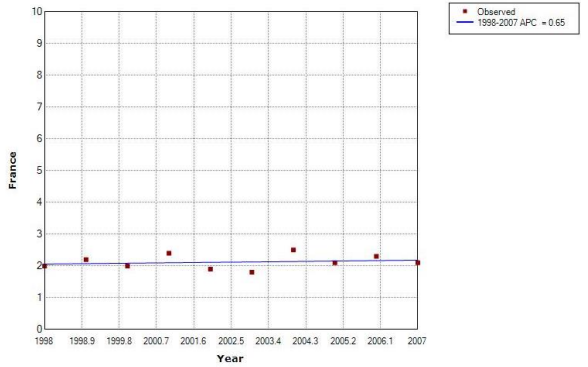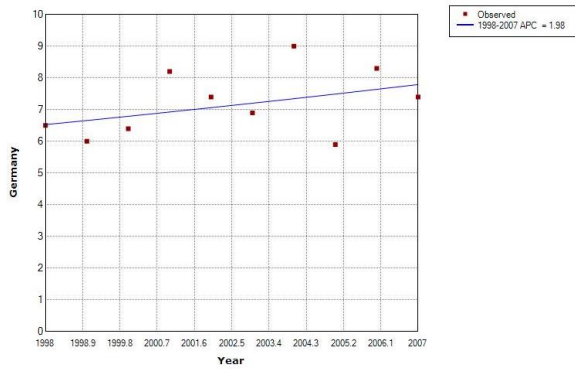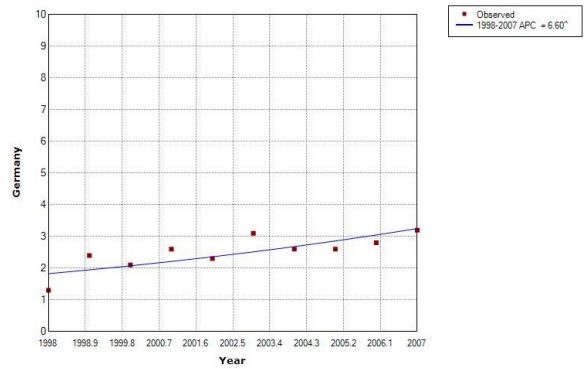

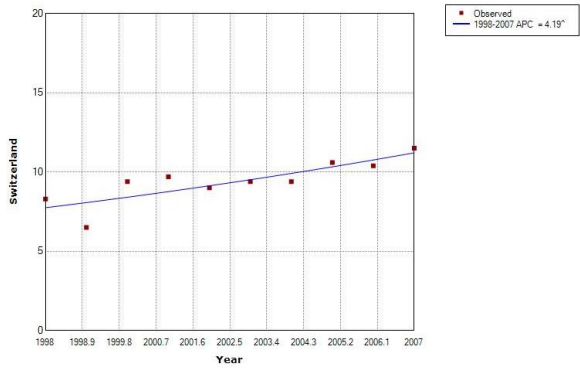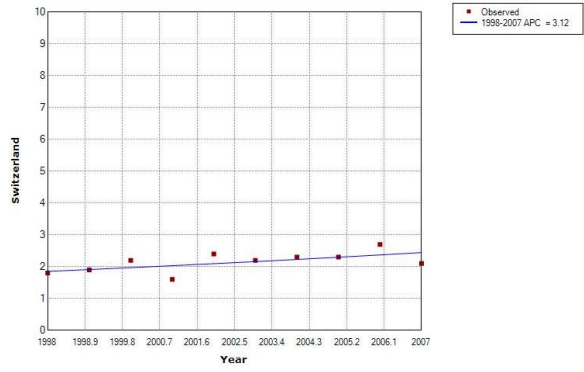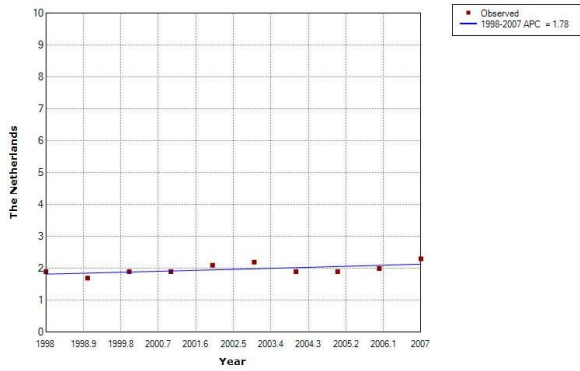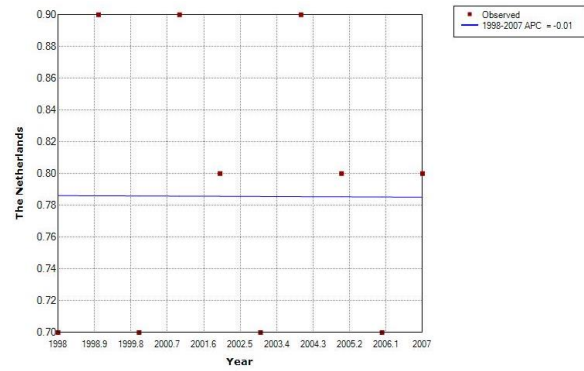

## 6) Southern Europe

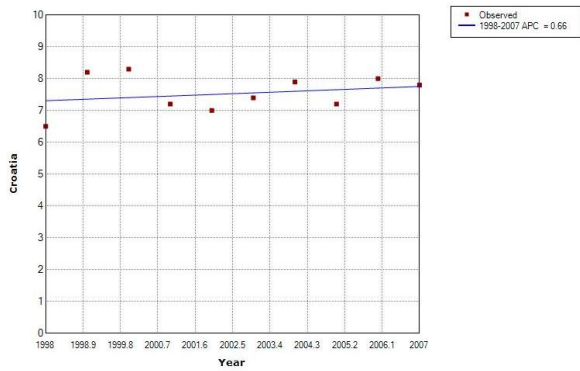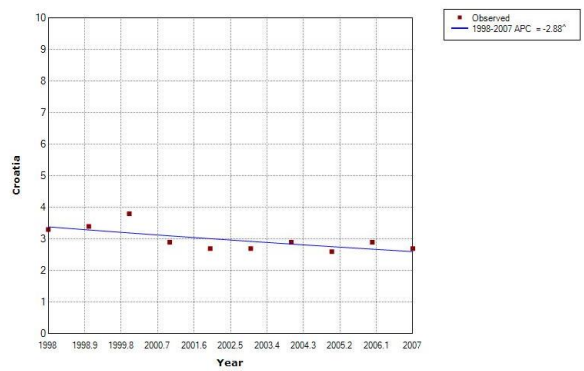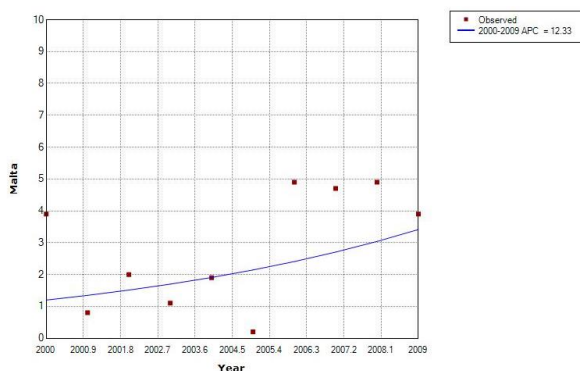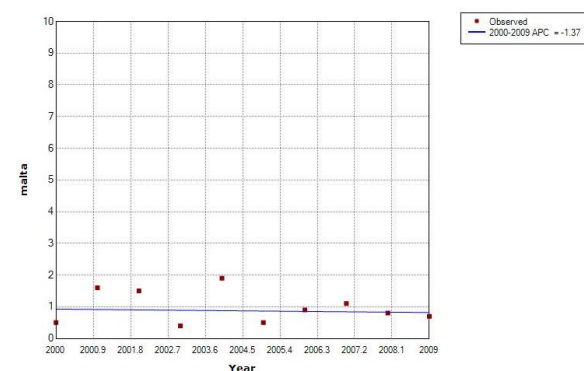

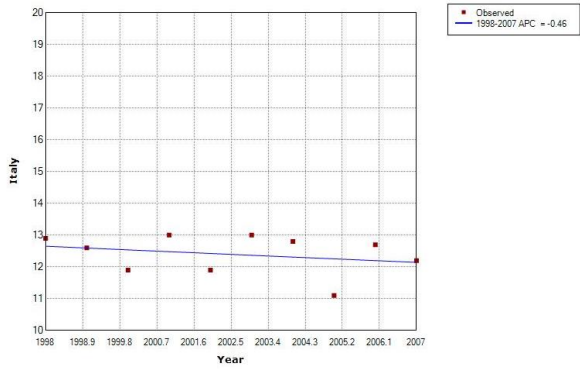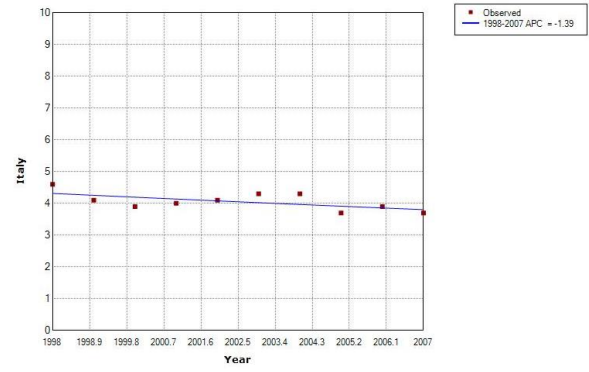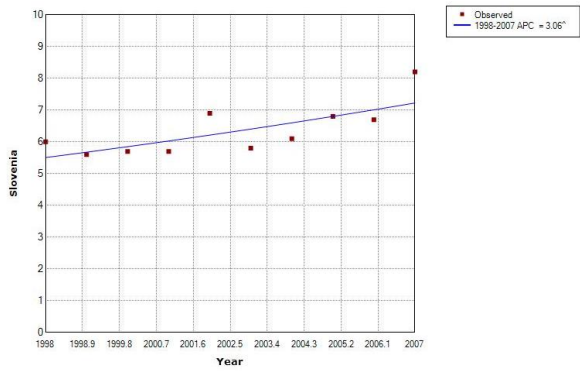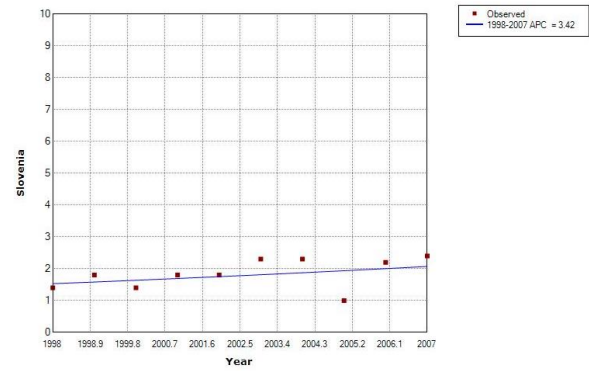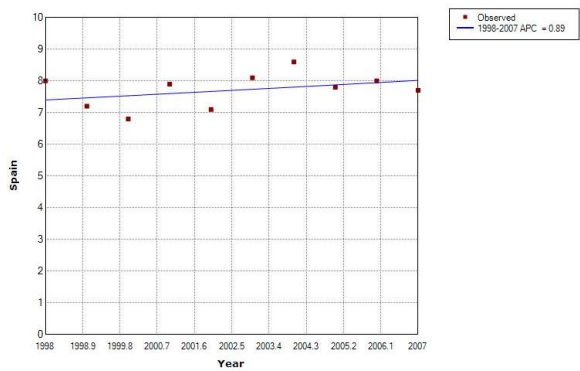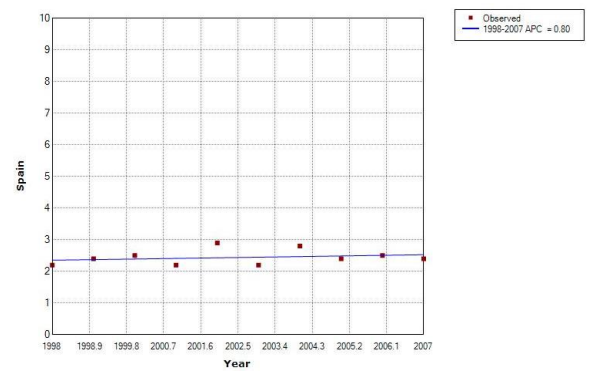

## 7) Eastern Europe

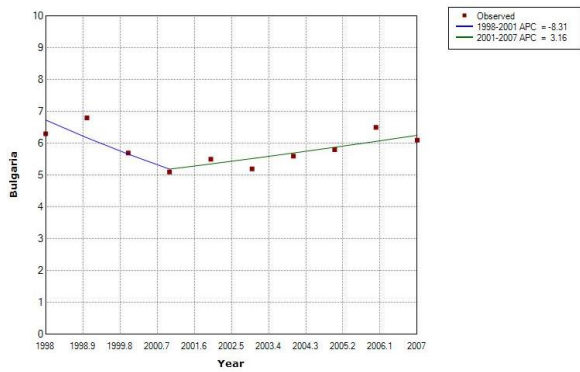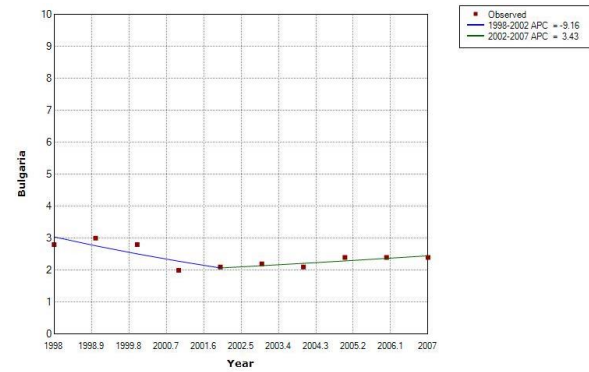



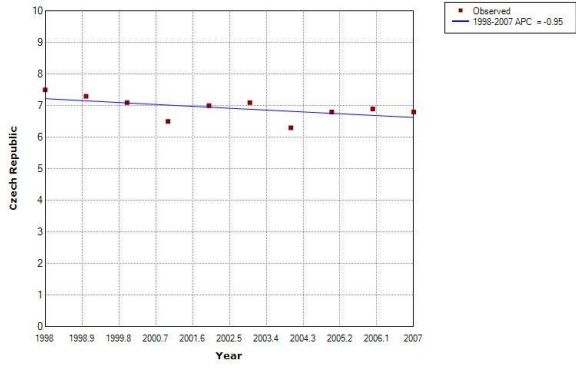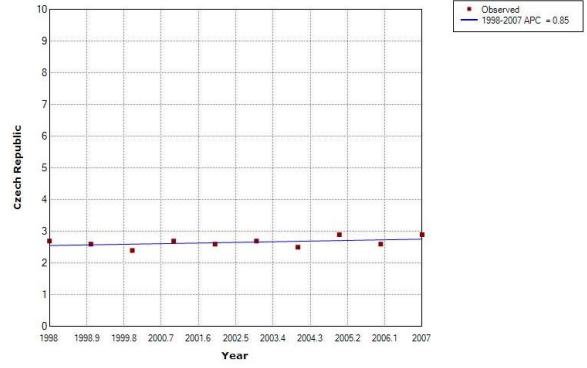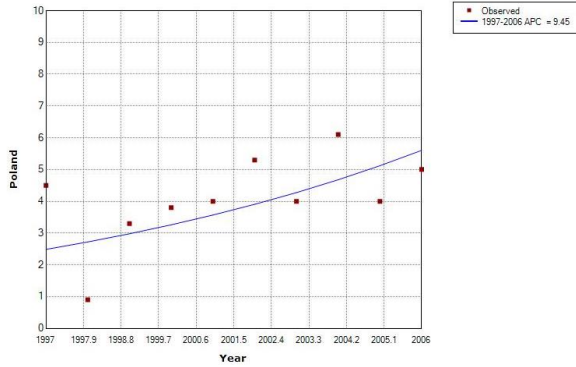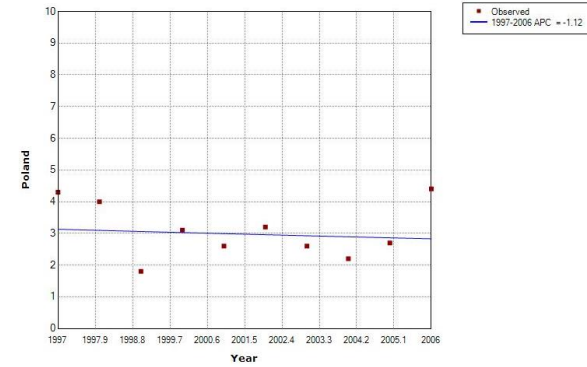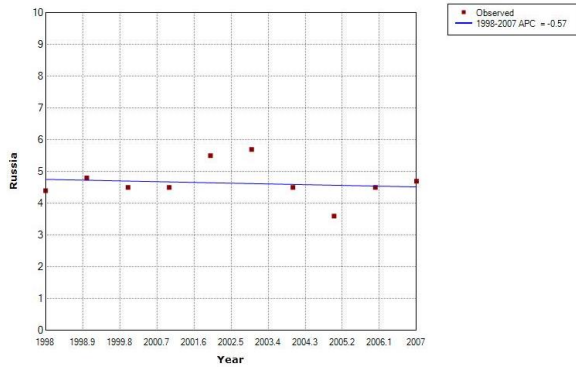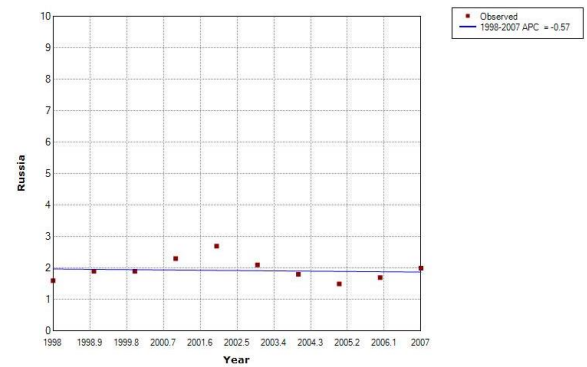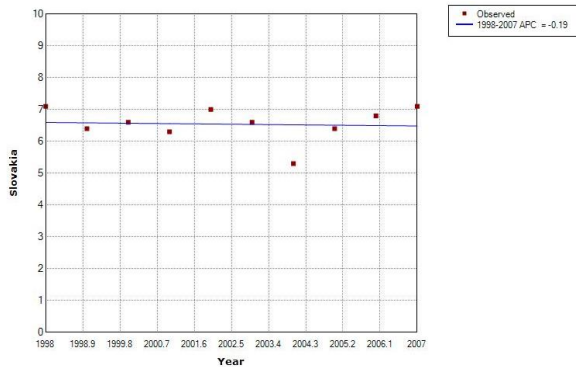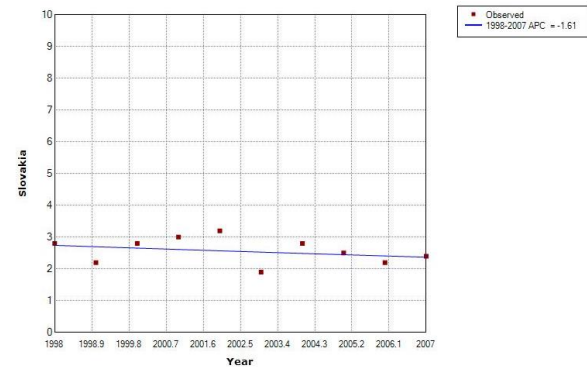

# Supplementary Figure 3 Findings from the joinpoint regression analysis of the global mortality rates of liver cancer (Left: Male, Right: Female)

## 1) Latin America and the Caribbean

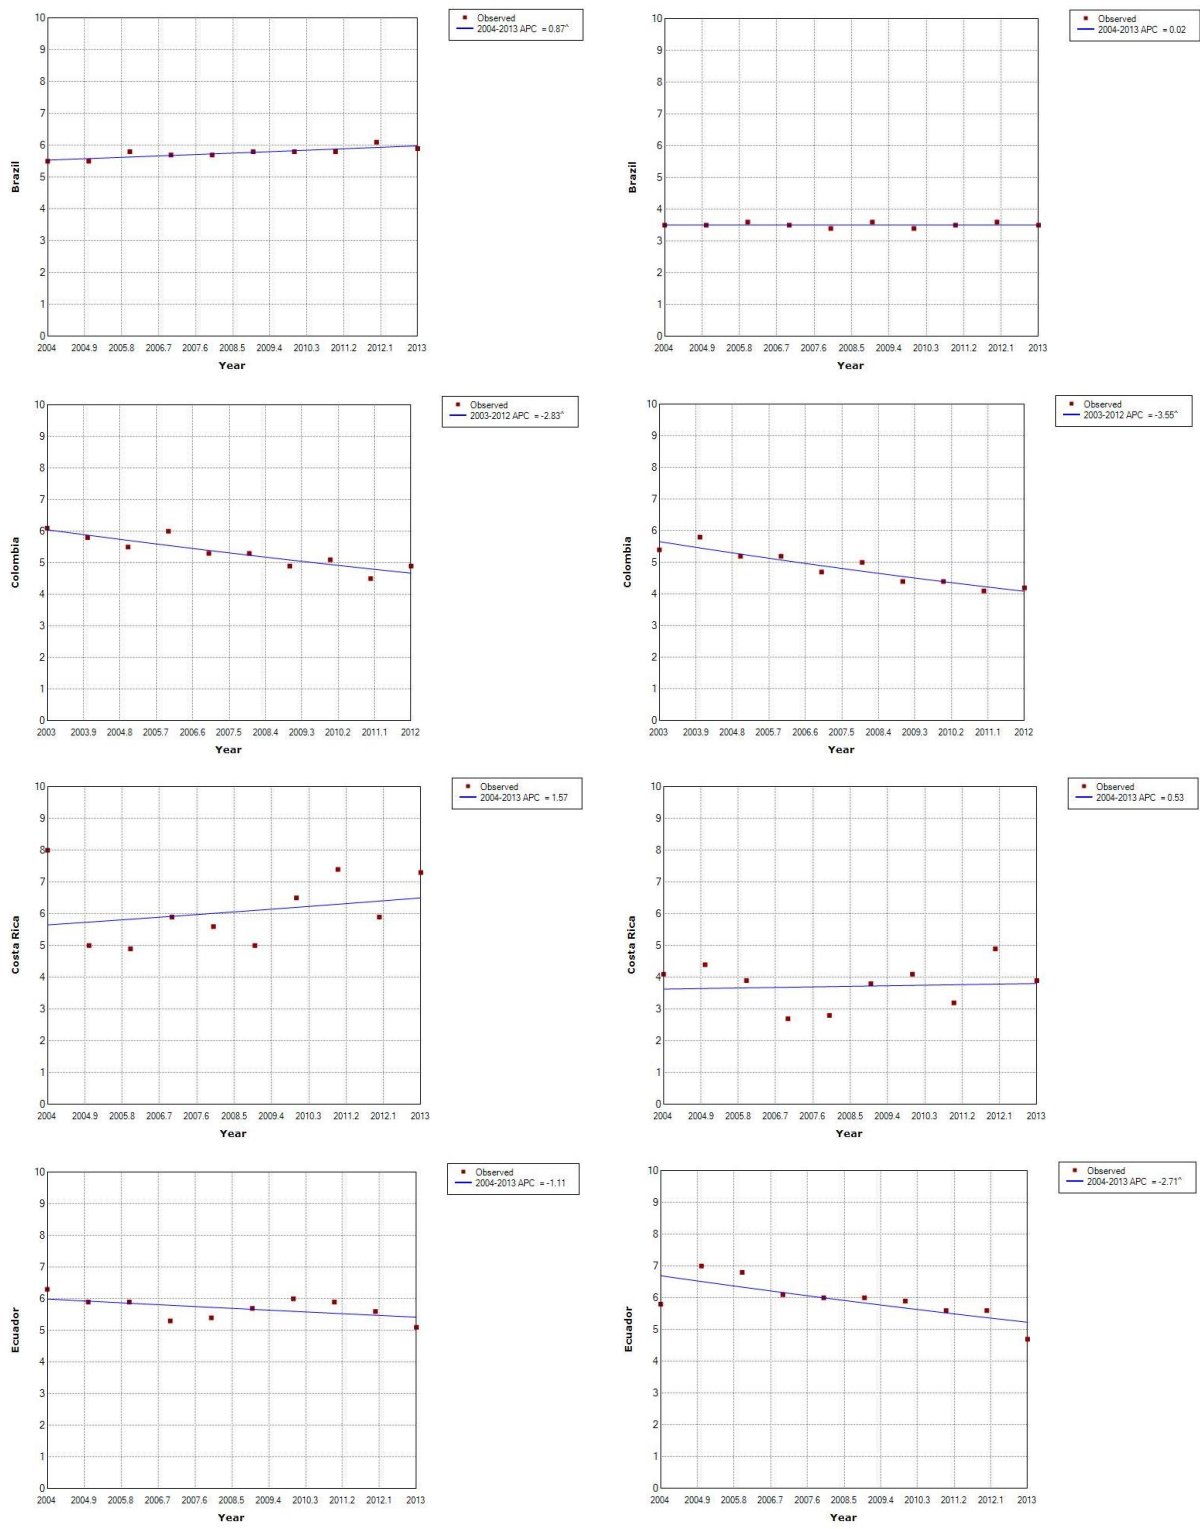

## 2) Northern America

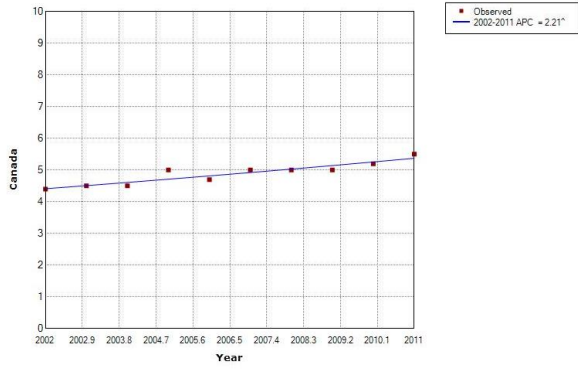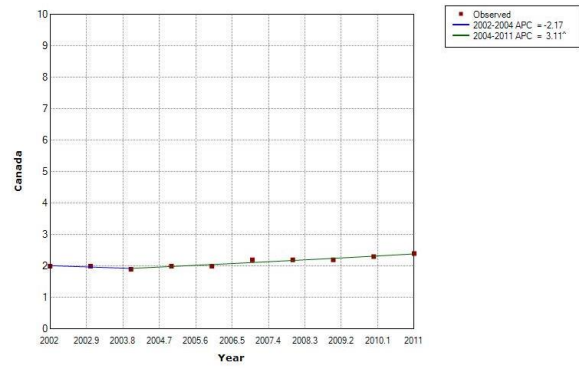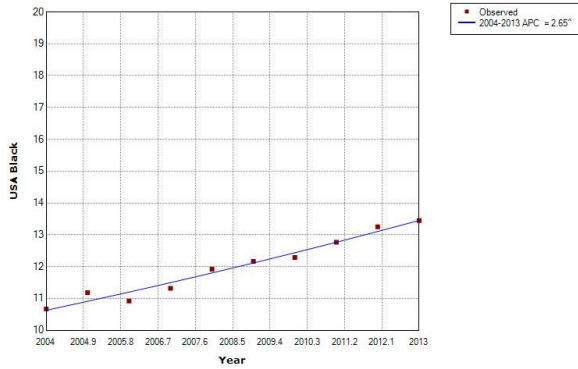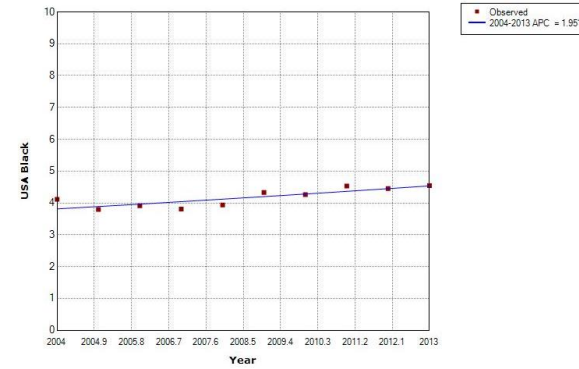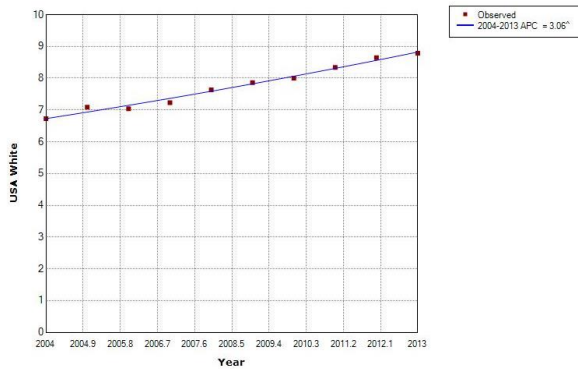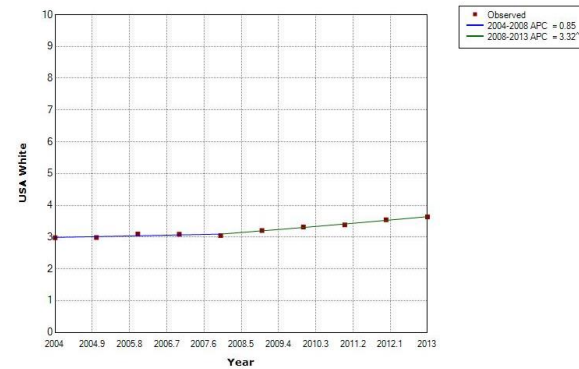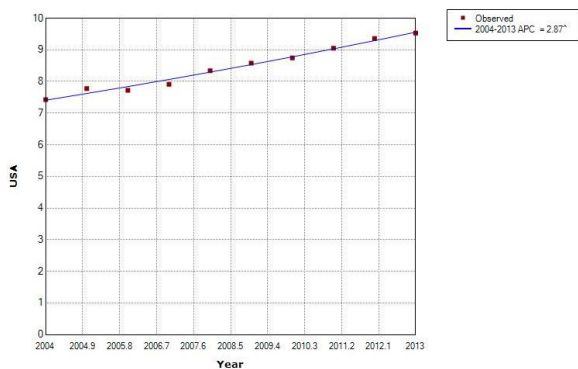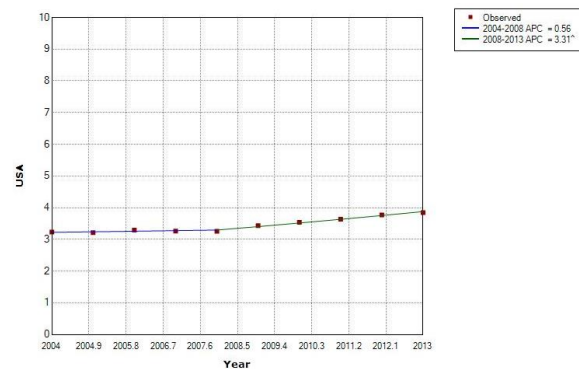

### 3) Asia

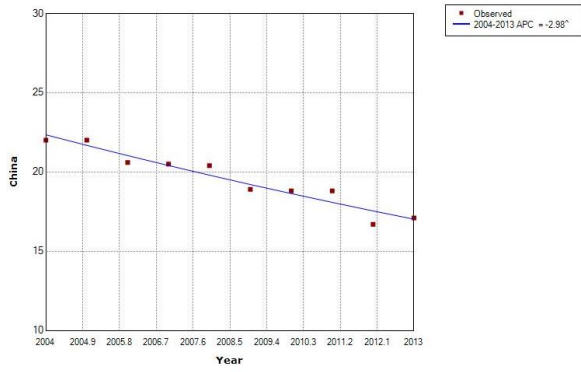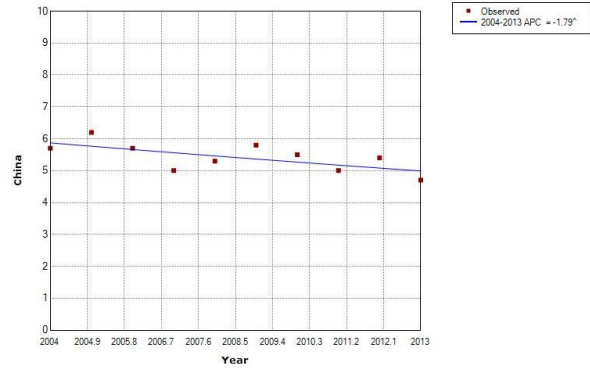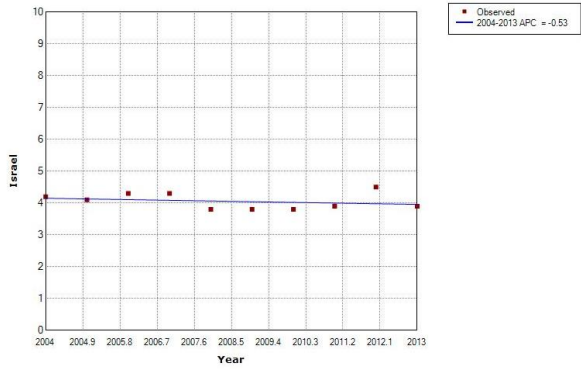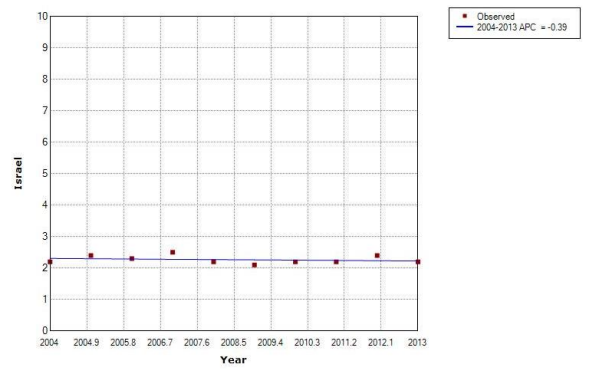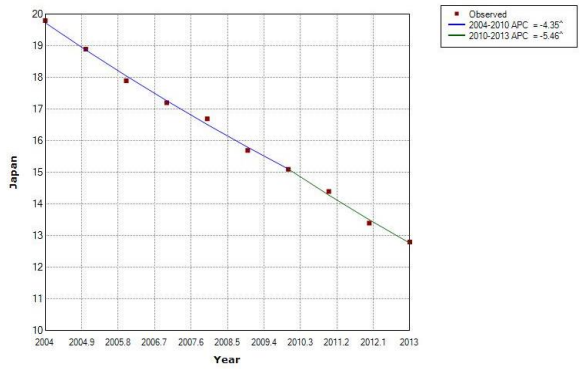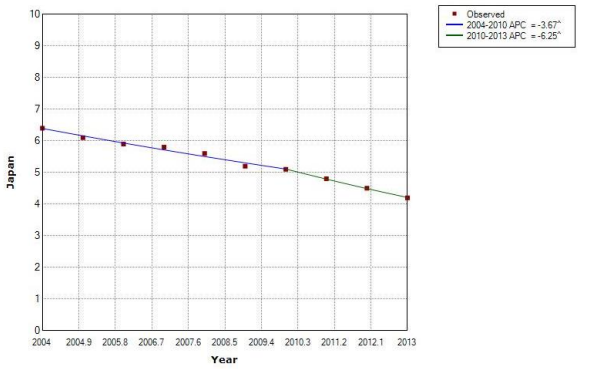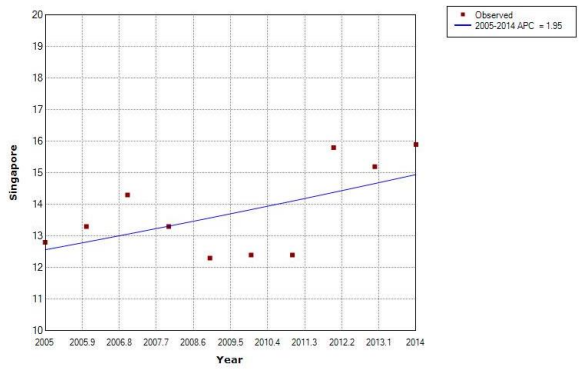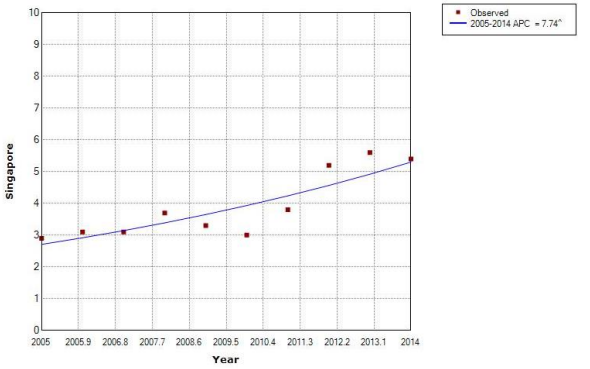

#### 4) Oceania

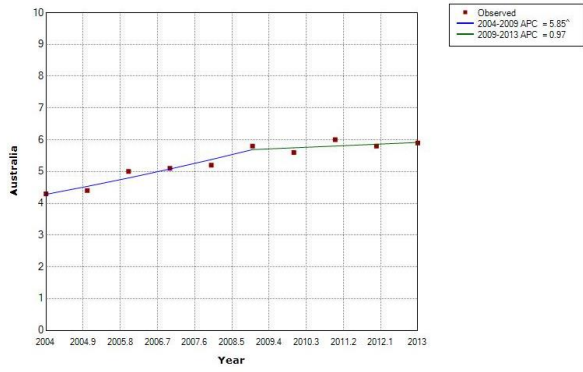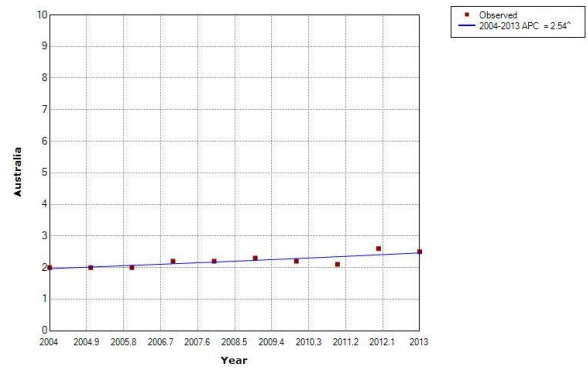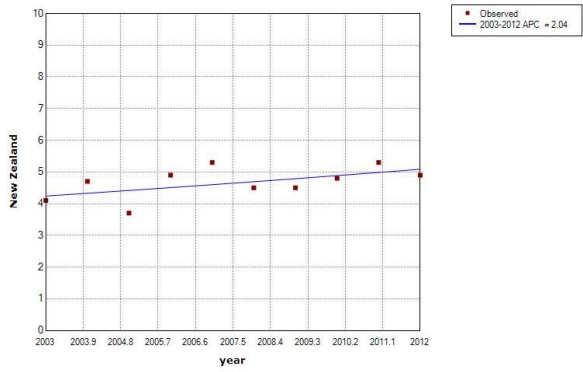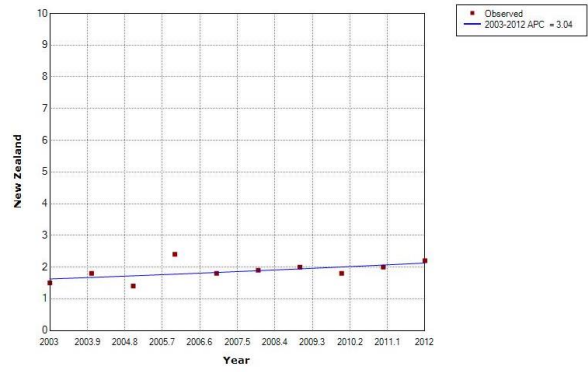

## 5) Northern Europe

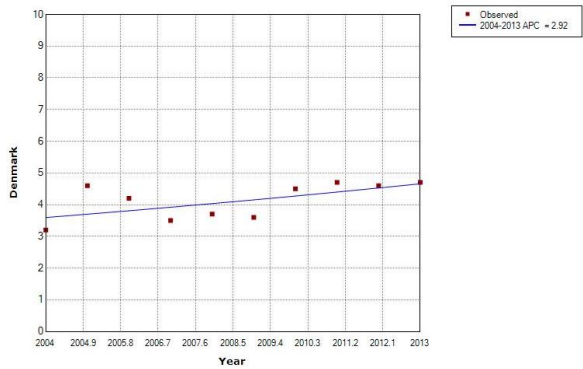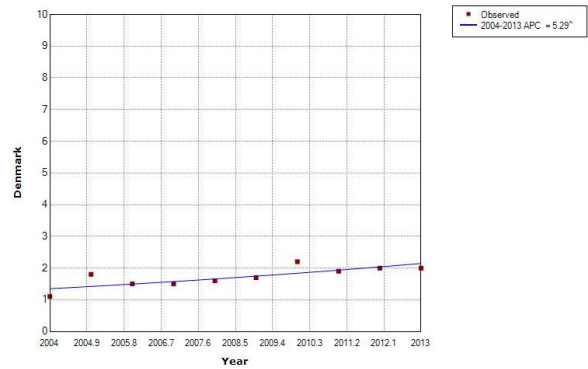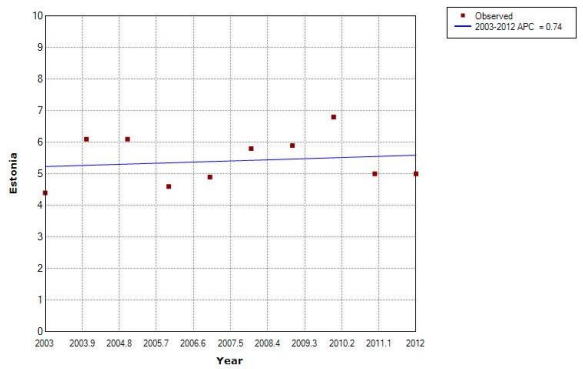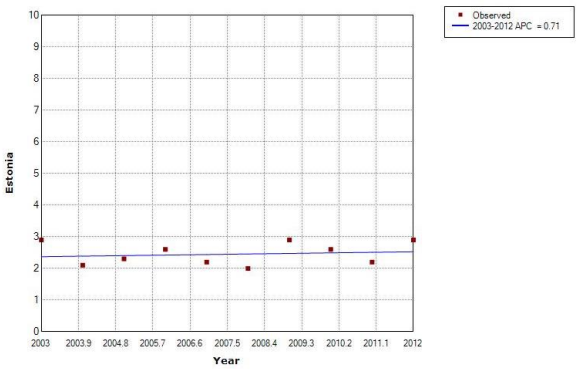

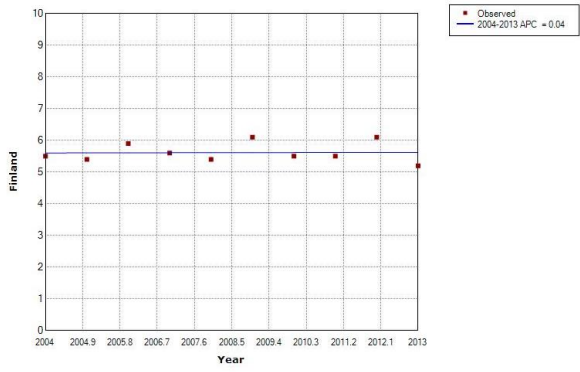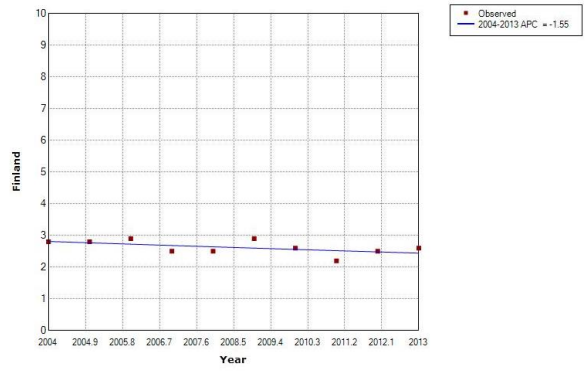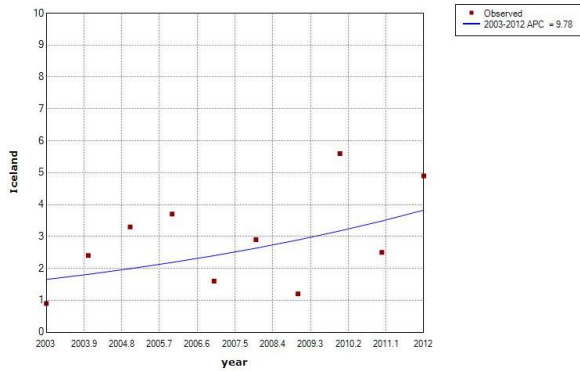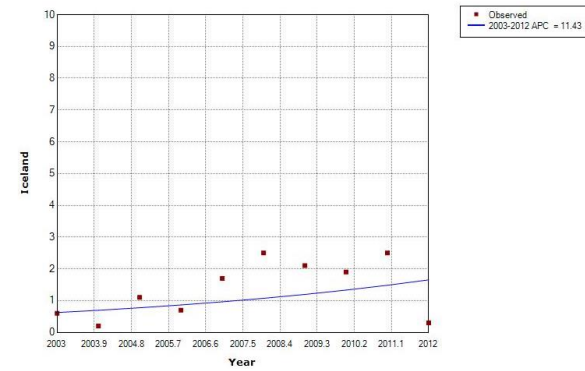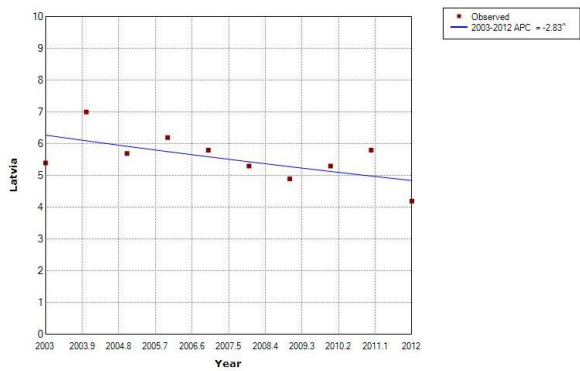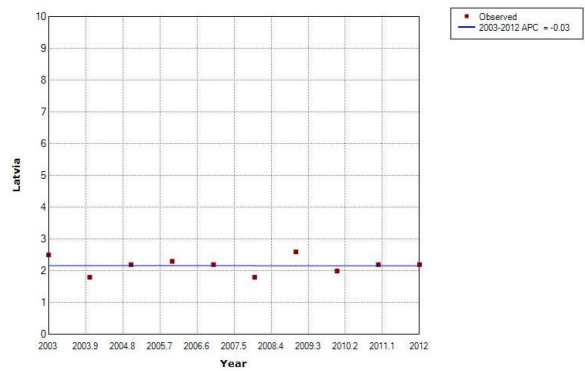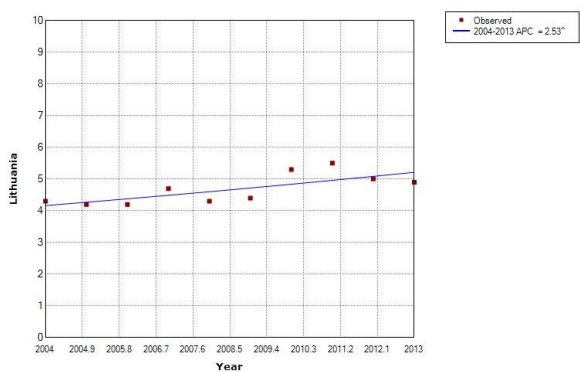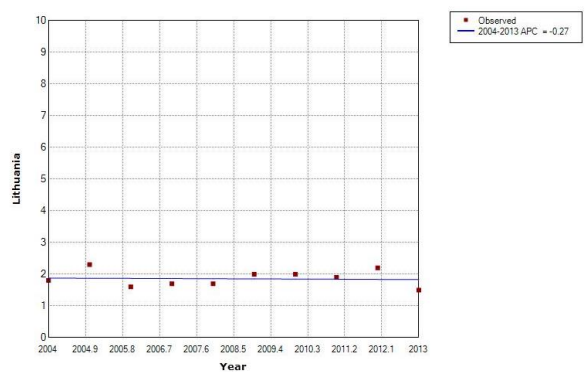

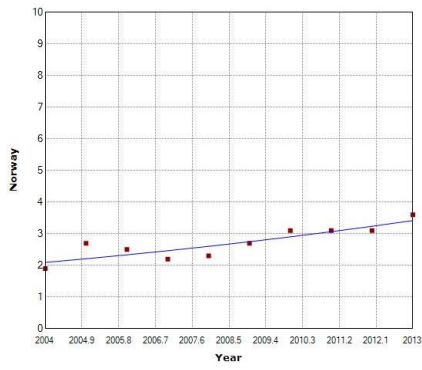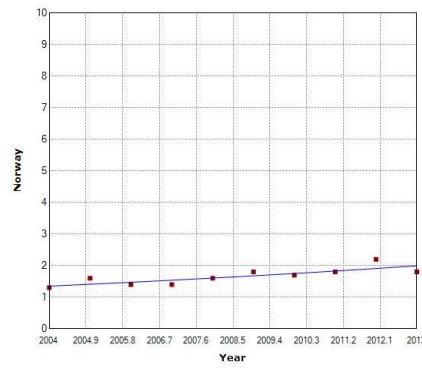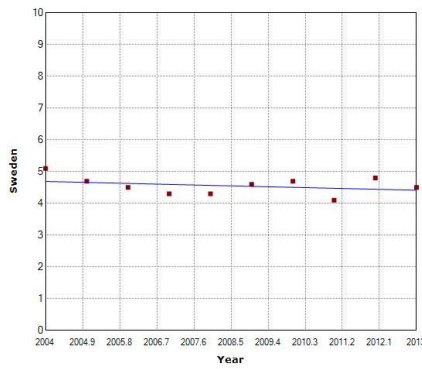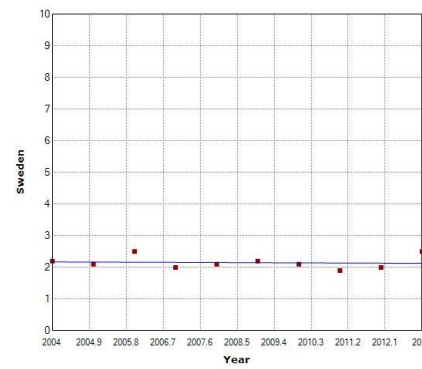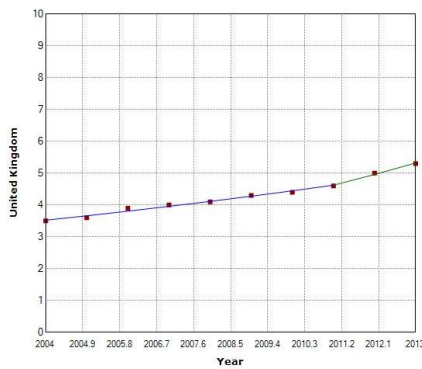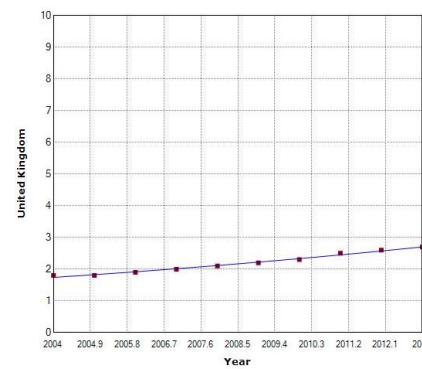

## 6) Western Europe

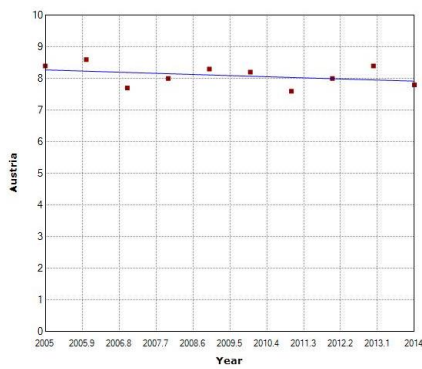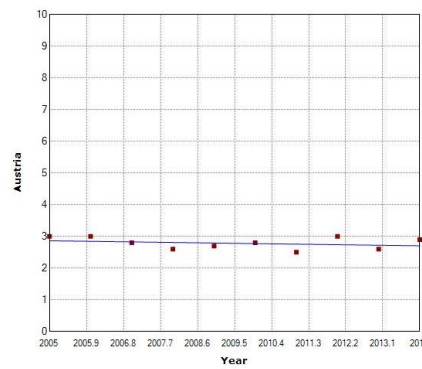

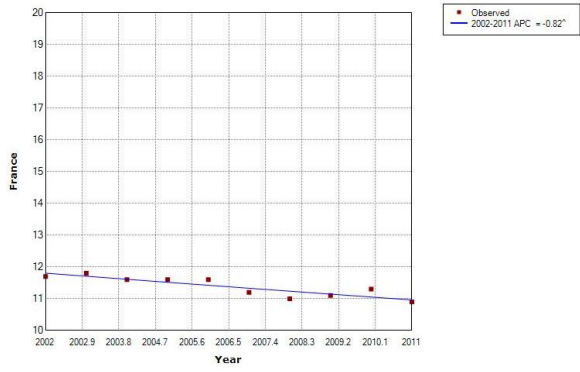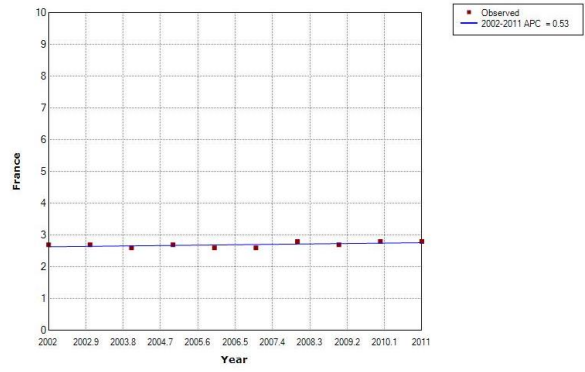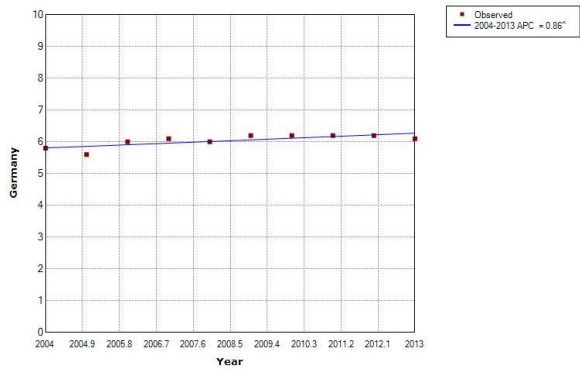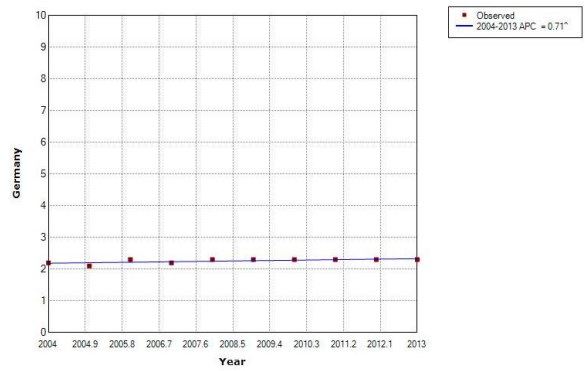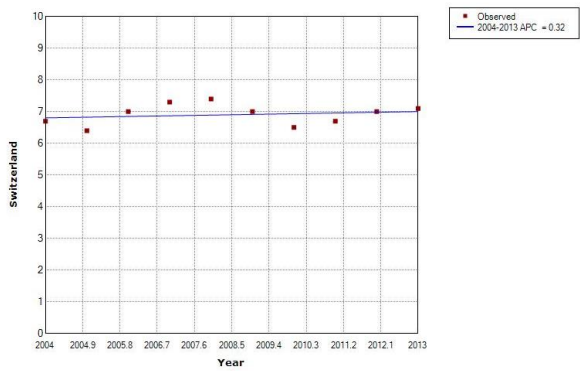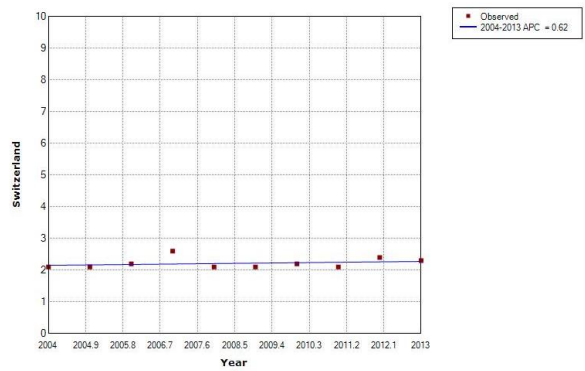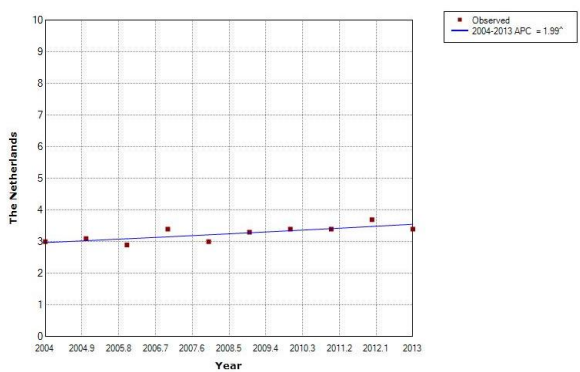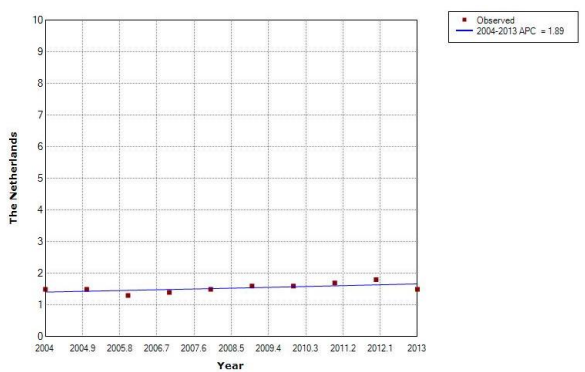



## 7) Southern Europe

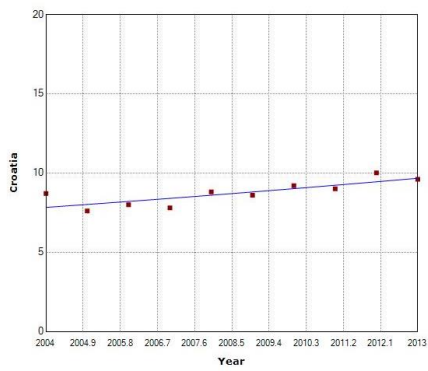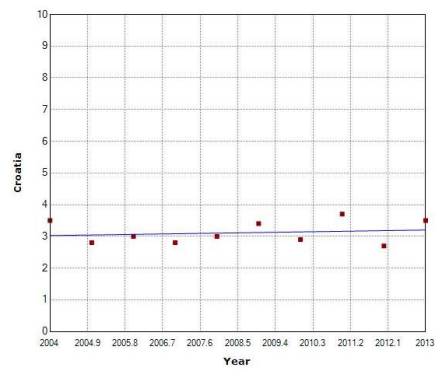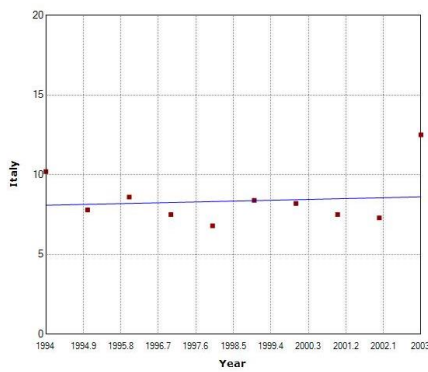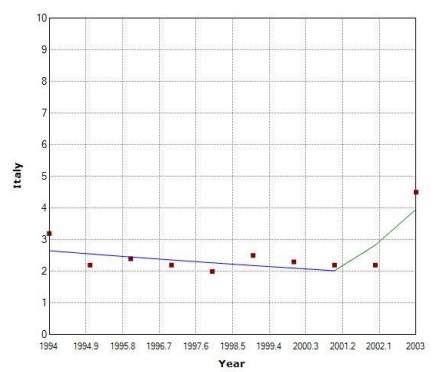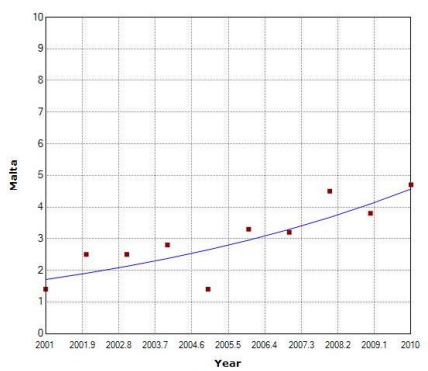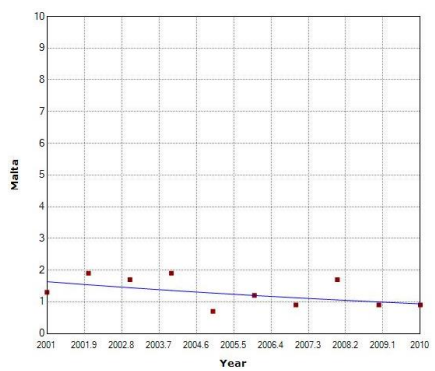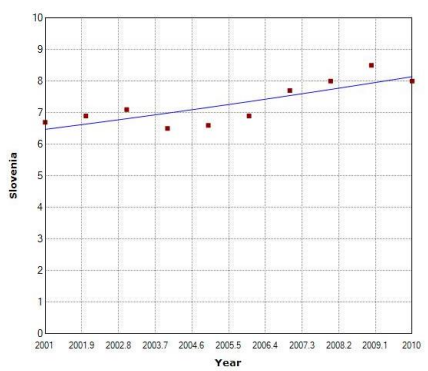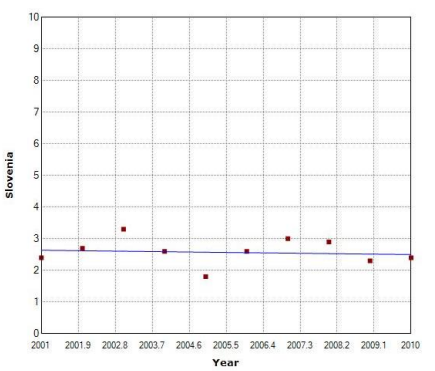

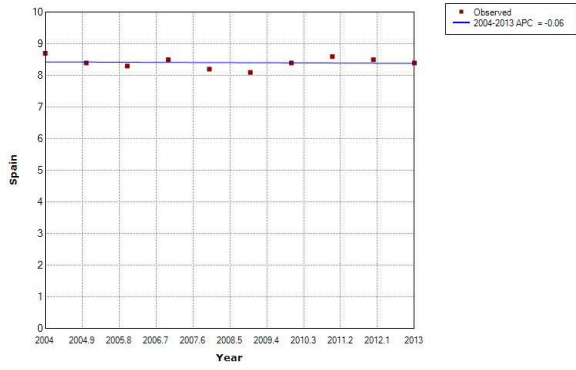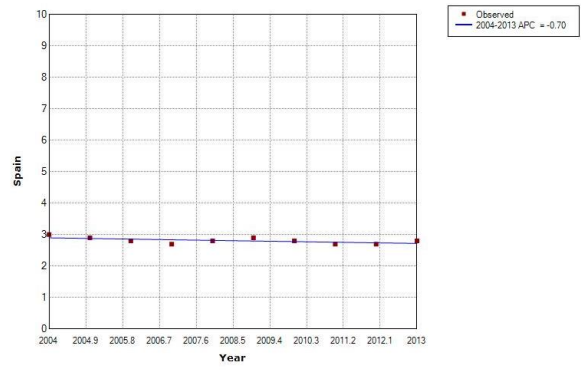

## 8) Eastern Europe

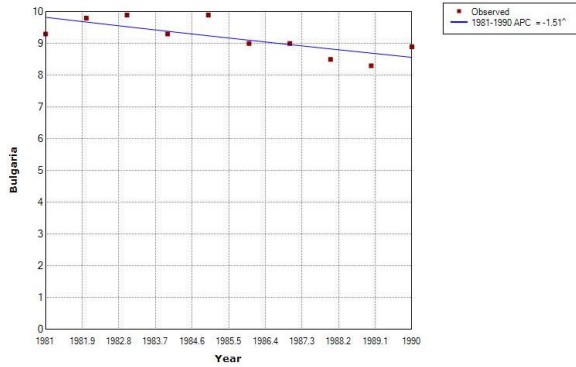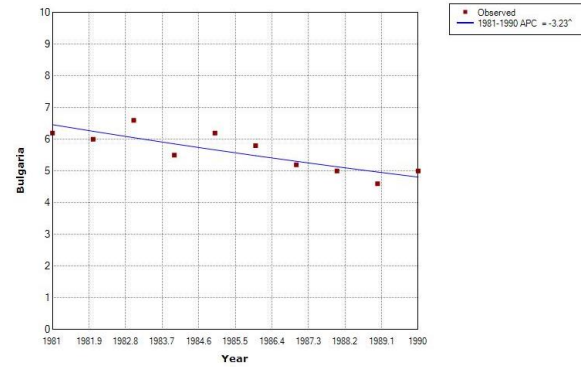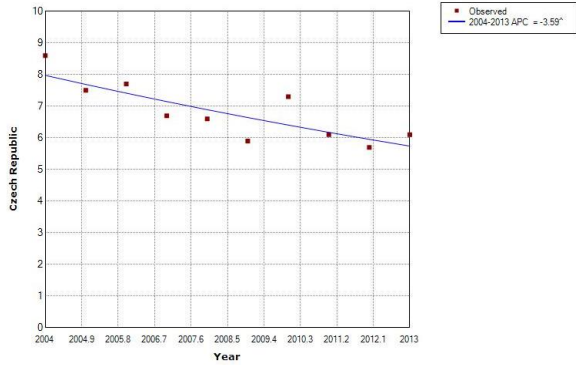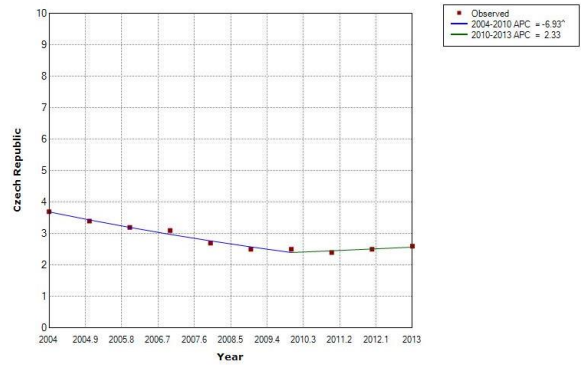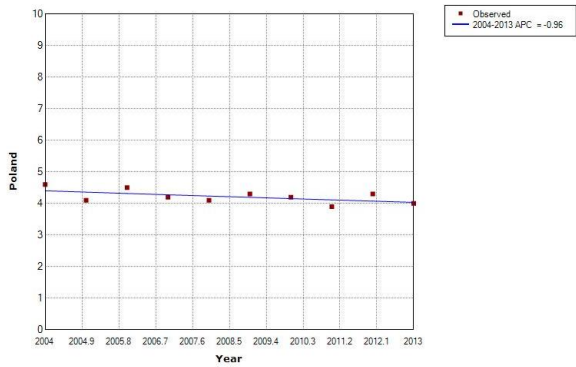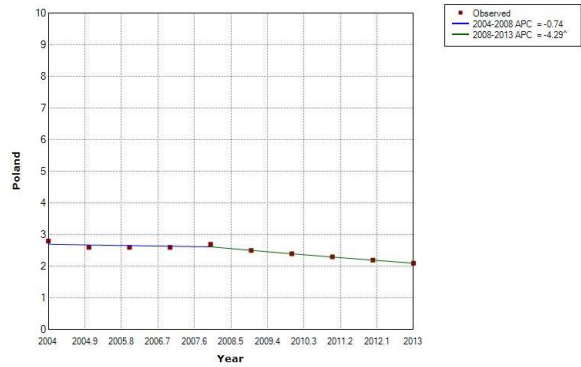

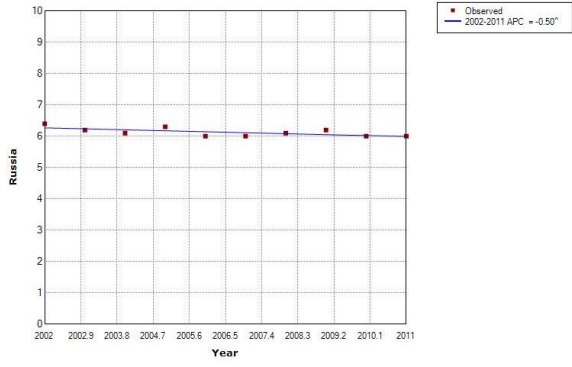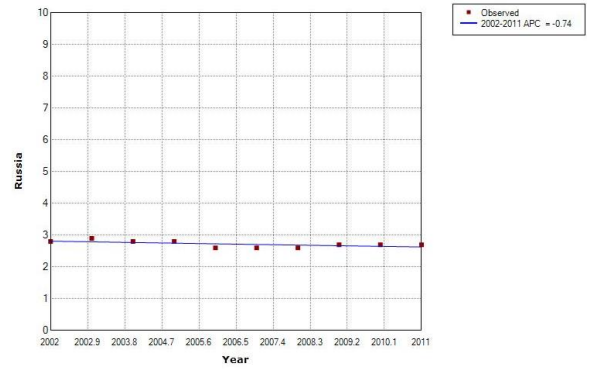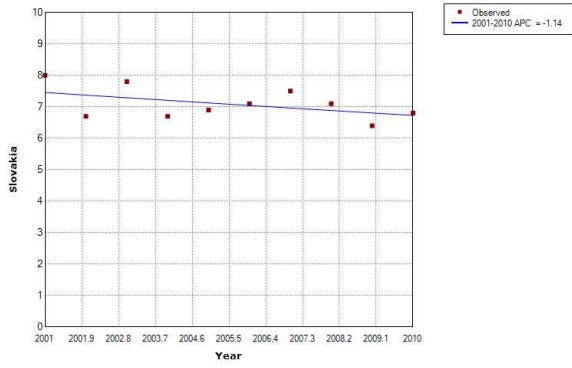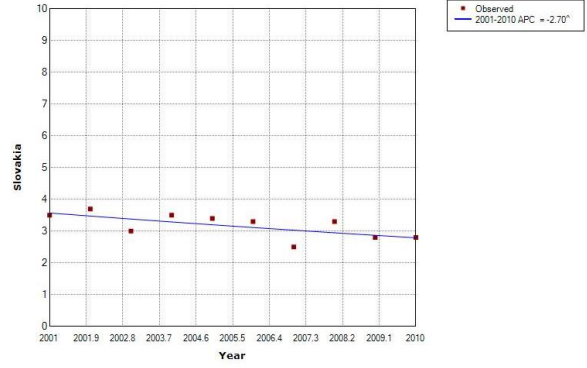

Supplement: srep45846-s1.pdf [file srep45846-s1.pdf]
